# Supplementary material for: Greenhouse gas emissions from tropical coastal wetlands and their alternative agricultural lands: Where significant mitigation gains lie
Source: Copernicus journal article supplement (doi:10.5194/bg-2021-28), 2021-03-19
Supplement: Supplementary file 1 [file bg-2021-28-supplement.pdf]

# Greenhouse gas emissions from tropical coastal wetlands and their alternative agricultural lands: Where significant mitigation gains lie

Iram et al. 2021

[Correspondence to: Naima Iram \(naima.iram@griffithuni.edu.au\)](mailto:naima.iram@griffithuni.edu.au)

Greenhouse gas emissions from tropical coastal wetlands and agricultural lands across annual seasonal cycle: Raw Data

| Land use         | Season   | Replicate | CO2 (mg/m2/hour) | CH4 (µg/m2/hour) | N2O-N (µg/m2/hour) |
|------------------|----------|-----------|------------------|------------------|--------------------|
| Mangroves        | Dry-Cold | 1         | 153.42           | 7.12             | 2.49               |
| Mangroves        | Dry-Cold | 2         | 139.32           | 9.31             | 0.00               |
| Mangroves        | Dry-Cold | 3         | 178.25           | 14.09            | 0.00               |
| Mangroves        | Dry-Cold | 1         | 146.94           | 78.67            | -10.25             |
| Mangroves        | Dry-Cold | 2         | 132.27           | 272.39           | -15.68             |
| Mangroves        | Dry-Cold | 3         | 119.56           | 370.68           | -4.67              |
| Mangroves        | Dry-Cold | 4         | 137.18           | 232.47           | -7.90              |
| Mangroves        | Dry-Cold | 5         | 131.42           | 102.86           | -16.38             |
| Mangroves        | Dry-Cold | 6         | 71.14            | 30.14            | -50.36             |
| Mangroves        | Dry-Cold | 7         | 129.54           | 35.42            | -31.14             |
| Mangroves        | Dry-Cold | 8         | 119.48           | 59.05            | -21.42             |
| Mangroves        | Dry-Cold | 9         | 81.78            | 25.20            | -5.55              |
| Mangroves        | Dry-Cold | 10        | 123.94           | 201.65           | -1.82              |
| Mangroves        | Dry-Cold | 11        | 98.48            | 77.93            | -48.72             |
| Mangroves        | Dry-Cold | 12        | 97.29            | 228.97           | -18.23             |
| Mangroves        | Dry-Cold | 13        | 61.34            | 54.64            | -24.34             |
| Mangroves        | Dry-Cold | 14        | 58.67            | 166.59           | -19.31             |
| Mangroves        | Dry-Cold | 15        | 82.47            | 175.88           | -19.50             |
| Saltmarsh        | Dry-Cold | 1         | 11.32            | -9.17            | 2.67               |
| Saltmarsh        | Dry-Cold | 2         | 5.98             | -10.60           | 2.65               |
| Saltmarsh        | Dry-Cold | 3         | 9.38             | -12.73           | 2.79               |
| Saltmarsh        | Dry-Cold | 1         | -58.47           | -2.66            | 7.00               |
| Saltmarsh        | Dry-Cold | 2         | -97.08           | -2.70            | 3.45               |
| Saltmarsh        | Dry-Cold | 3         | -60.19           | 0.65             | 1.28               |
| Saltmarsh        | Dry-Cold | 4         | -72.93           | -3.29            | 0.54               |
| Saltmarsh        | Dry-Cold | 5         | 0.99             | 2.40             | 7.24               |
| Saltmarsh        | Dry-Cold | 6         | -82.09           | -5.65            | 4.29               |
| Saltmarsh        | Dry-Cold | 7         | -40.11           | -14.99           | 0.72               |
| Saltmarsh        | Dry-Cold | 8         | -24.60           | -2.14            | 2.83               |
| Saltmarsh        | Dry-Cold | 9         | -65.84           | -23.46           | 5.08               |
| Saltmarsh        | Dry-Cold | 10        | -66.18           | -1.35            | 4.21               |
| Saltmarsh        | Dry-Cold | 11        | -68.59           | -12.05           | 10.13              |
| Saltmarsh        | Dry-Cold | 12        | -37.39           | -1.95            | 7.49               |
| Saltmarsh        | Dry-Cold | 13        | 14.18            | -5.07            | 15.07              |
| Saltmarsh        | Dry-Cold | 14        | -27.15           | -7.55            | -1.24              |
| Saltmarsh        | Dry-Cold | 15        | -15.00           | -1.67            | 9.17               |
| FW tidal wetland | Dry-Cold | 1         | 246.11           | 102.83           | -1.03              |
| FW tidal wetland | Dry-Cold | 2         | 218.41           | 82.70            | 0.35               |
| FW tidal wetland | Dry-Cold | 3         | 253.00           | 53.82            | 4.93               |
| FW tidal wetland | Dry-Cold | 4         | 218.29           | 150.71           | 1.56               |
| FW tidal wetland | Dry-Cold | 5         | 236.02           | 54.02            | 0.43               |
| FW tidal wetland | Dry-Cold | 6         | 49.24            | 26.56            | -7.44              |
| FW tidal wetland | Dry-Cold | 7         | 55.55            | 0.60             | -2.13              |
| FW tidal wetland | Dry-Cold | 8         | 49.79            | 16.67            | 3.55               |
| FW tidal wetland | Dry-Cold | 9         | 55.87            | 11.93            | 12.28              |
| FW tidal wetland | Dry-Cold | 10        | 40.42            | 73.27            | 3.24               |
| FW tidal wetland | Dry-Cold | 11        | 117.89           | 26.70            | -6.74              |

|                    |          |    |        |          |        |
|--------------------|----------|----|--------|----------|--------|
| FW tidal wetland   | Dry-Cold | 12 | 99.34  | 60.78    | 7.92   |
| FW tidal wetland   | Dry-Cold | 13 | 81.41  | 9.96     | 2.14   |
| FW tidal wetland   | Dry-Cold | 14 | 75.49  | 19.03    | 2.69   |
| FW tidal wetland   | Dry-Cold | 15 | 58.28  | -1.73    | 1.27   |
| Sugarcane          | Dry-Cold | 1  | 68.18  | -25.35   | -5.54  |
| Sugarcane          | Dry-Cold | 2  | 47.88  | -18.16   | -8.67  |
| Sugarcane          | Dry-Cold | 3  | 61.81  | -27.45   | -12.01 |
| Sugarcane          | Dry-Cold | 1  | 125.50 | -14.81   | -3.85  |
| Sugarcane          | Dry-Cold | 2  | 100.44 | 3.54     | -9.61  |
| Sugarcane          | Dry-Cold | 3  | 112.37 | 3.36     | -5.97  |
| Sugarcane          | Dry-Cold | 4  | 132.08 | -14.73   | -5.05  |
| Sugarcane          | Dry-Cold | 5  | 137.19 | 2.56     | -7.67  |
| Sugarcane          | Dry-Cold | 6  | 30.28  | -4.20    | -5.46  |
| Sugarcane          | Dry-Cold | 7  | 35.29  | -9.78    | -4.02  |
| Sugarcane          | Dry-Cold | 8  | 28.36  | -12.15   | -3.78  |
| Sugarcane          | Dry-Cold | 9  | 30.11  | -15.07   | -4.39  |
| Sugarcane          | Dry-Cold | 10 | 37.91  | -14.45   | -4.45  |
| Sugarcane          | Dry-Cold | 11 | 32.49  | -9.56    | -5.46  |
| Sugarcane          | Dry-Cold | 12 | 38.04  | -10.30   | -4.02  |
| Sugarcane          | Dry-Cold | 13 | 17.73  | -9.66    | -3.78  |
| Sugarcane          | Dry-Cold | 14 | 12.89  | -9.73    | -4.39  |
| Sugarcane          | Dry-Cold | 15 | 15.58  | -9.86    | -4.45  |
| Dry ponded pasture | Dry-Cold | 1  | 319.57 | 6.13     | 170.50 |
| Dry ponded pasture | Dry-Cold | 2  | 480.56 | 14.61    | 122.49 |
| Dry ponded pasture | Dry-Cold | 3  | 213.81 | 12.87    | 152.50 |
| Dry ponded pasture | Dry-Cold | 4  | 499.73 | 11.36    | 178.40 |
| Dry ponded pasture | Dry-Cold | 5  | 949.72 | 25.15    | 393.89 |
| Dry ponded pasture | Dry-Cold | 6  | 418.45 | 18.95    | 66.82  |
| Dry ponded pasture | Dry-Cold | 7  | 336.48 | 4.88     | 18.14  |
| Dry ponded pasture | Dry-Cold | 8  | 379.92 | -9.66    | 19.75  |
| Dry ponded pasture | Dry-Cold | 9  | 593.20 | 46.20    | 335.94 |
| Dry ponded pasture | Dry-Cold | 10 | 529.93 | -16.29   | 239.77 |
| Wet ponded pasture | Dry-Cold | 1  | 19.59  | 2957.20  | 36.77  |
| Wet ponded pasture | Dry-Cold | 2  | 88.75  | 26108.86 | 54.19  |
| Wet ponded pasture | Dry-Cold | 3  | 41.55  | 26870.72 | 27.77  |
| Wet ponded pasture | Dry-Cold | 4  | 45.92  | 17183.93 | 41.80  |
| Wet ponded pasture | Dry-Cold | 5  | 17.03  | 2338.01  | 29.94  |
| Wet ponded pasture | Dry-Cold | 6  | 30.32  | 7713.55  | 17.85  |
| Wet ponded pasture | Dry-Cold | 7  | 9.38   | 10881.02 | 23.61  |
| Wet ponded pasture | Dry-Cold | 8  | 48.74  | 10855.72 | 5.88   |
| Wet ponded pasture | Dry-Cold | 9  | 52.98  | 8161.26  | 21.35  |
| Wet ponded pasture | Dry-Cold | 10 | 14.21  | 9212.73  | 22.64  |
| Mangroves          | Dry-Hot  | 1  | 122.95 | 17.59    | 17.49  |
| Mangroves          | Dry-Hot  | 2  | 83.77  | 15.55    | 13.71  |
| Mangroves          | Dry-Hot  | 3  | 156.79 | 17.47    | 22.29  |
| Mangroves          | Dry-Hot  | 4  | 144.06 | 26.38    | 32.33  |
| Mangroves          | Dry-Hot  | 5  | 109.13 | 16.90    | 23.58  |
| Mangroves          | Dry-Hot  | 6  | 231.75 | 15.40    | 26.85  |
| Mangroves          | Dry-Hot  | 7  | 125.14 | 5.02     | 8.79   |
| Mangroves          | Dry-Hot  | 8  | 122.58 | 8.76     | 14.02  |
| Mangroves          | Dry-Hot  | 9  | 132.31 | 16.14    | 9.31   |
| Saltmarsh          | Dry-Hot  | 1  | -56.84 | -14.34   | 17.36  |
| Saltmarsh          | Dry-Hot  | 2  | -59.13 | -14.83   | 58.67  |
| Saltmarsh          | Dry-Hot  | 3  | -53.74 | -9.51    | 81.55  |
| Saltmarsh          | Dry-Hot  | 4  | -44.59 | -5.58    | 20.49  |
| Saltmarsh          | Dry-Hot  | 5  | -56.56 | -8.36    | 95.44  |

|                    |         |    |        |           |        |
|--------------------|---------|----|--------|-----------|--------|
| Saltmarsh          | Dry-Hot | 6  | -38.79 | -9.90     | 165.84 |
| Saltmarsh          | Dry-Hot | 7  | -30.99 | -10.67    | 20.48  |
| Saltmarsh          | Dry-Hot | 8  | -40.01 | -2.00     | 77.71  |
| Saltmarsh          | Dry-Hot | 9  | -65.88 | -4.57     | 122.06 |
| FW tidal wetland   | Dry-Hot | 1  | 237.06 | 4.53      | 7.58   |
| FW tidal wetland   | Dry-Hot | 2  | 282.37 | 10.54     | 1.75   |
| FW tidal wetland   | Dry-Hot | 3  | 212.06 | 7.19      | 1.60   |
| FW tidal wetland   | Dry-Hot | 4  | 199.74 | 7.09      | 1.91   |
| FW tidal wetland   | Dry-Hot | 5  | 96.87  | 5.17      | 5.38   |
| FW tidal wetland   | Dry-Hot | 6  | 264.12 | 5.15      | 7.49   |
| FW tidal wetland   | Dry-Hot | 7  | 288.33 | 11.72     | 7.83   |
| FW tidal wetland   | Dry-Hot | 8  | 219.64 | 1.14      | 3.21   |
| FW tidal wetland   | Dry-Hot | 9  | 354.09 | 3.53      | 2.34   |
| Sugarcane          | Dry-Hot | 1  | 202.01 | 22.56     | 801.12 |
| Sugarcane          | Dry-Hot | 2  | 205.76 | 3.22      | 8.41   |
| Sugarcane          | Dry-Hot | 3  | 112.32 | 11.54     | 574.39 |
| Sugarcane          | Dry-Hot | 4  | 159.31 | 3.01      | 317.65 |
| Sugarcane          | Dry-Hot | 5  | 84.91  | 1.38      | 464.92 |
| Sugarcane          | Dry-Hot | 6  | 188.37 | 1.32      | 667.65 |
| Sugarcane          | Dry-Hot | 7  | 128.34 | 9.10      | 446.05 |
| Sugarcane          | Dry-Hot | 8  | 157.68 | 14.41     | 421.80 |
| Sugarcane          | Dry-Hot | 9  | 208.40 | 12.35     | 503.70 |
| Dry ponded pasture | Dry-Hot | 1  | 737.82 | 3.59      | 4.14   |
| Dry ponded pasture | Dry-Hot | 2  | 877.98 | -0.08     | 8.69   |
| Dry ponded pasture | Dry-Hot | 3  | 610.17 | 4.24      | 8.54   |
| Dry ponded pasture | Dry-Hot | 4  | 648.86 | 3.94      | 7.45   |
| Dry ponded pasture | Dry-Hot | 5  | 541.33 | 10.42     | 16.56  |
| Dry ponded pasture | Dry-Hot | 6  | 744.15 | 5.33      | 5.24   |
| Dry ponded pasture | Dry-Hot | 7  | 721.74 | 3.54      | 11.94  |
| Dry ponded pasture | Dry-Hot | 8  | 477.30 | 5.23      | 14.31  |
| Dry ponded pasture | Dry-Hot | 9  | 549.06 | 9.98      | 6.21   |
| Dry ponded pasture | Dry-Hot | 10 | 703.69 | 2.52      | 1.87   |
| Dry ponded pasture | Dry-Hot | 11 | 648.71 | 2.35      | 11.65  |
| Wet ponded pasture | Dry-Hot | 1  | 739.48 | 94514.74  | 119.21 |
| Wet ponded pasture | Dry-Hot | 2  | 639.16 | 100316.66 | 94.05  |
| Wet ponded pasture | Dry-Hot | 3  | 469.04 | 59077.07  | 132.10 |
| Wet ponded pasture | Dry-Hot | 4  | 400.71 | 27306.52  | 70.47  |
| Wet ponded pasture | Dry-Hot | 5  | 514.59 | 25270.21  | 119.84 |
| Wet ponded pasture | Dry-Hot | 6  | 506.21 | 33480.44  | 436.95 |
| Wet ponded pasture | Dry-Hot | 7  | 660.90 | 23772.51  | 335.70 |
| Wet ponded pasture | Dry-Hot | 8  | 728.68 | 14353.43  | 332.28 |
| Wet ponded pasture | Dry-Hot | 9  | 562.20 | 40968.53  | 716.23 |
| Wet ponded pasture | Dry-Hot | 10 | 392.95 | 42638.00  | 147.24 |
| Wet ponded pasture | Dry-Hot | 11 | 430.43 | 56203.81  | 276.61 |
| Mangroves          | Wet-Hot | 1  | 500.77 | 278.14    | -8.22  |
| Mangroves          | Wet-Hot | 2  | 322.10 | 300.67    | -3.20  |
| Mangroves          | Wet-Hot | 3  | 371.71 | 181.10    | -3.30  |
| Mangroves          | Wet-Hot | 4  | 295.57 | 284.73    | -12.19 |
| Mangroves          | Wet-Hot | 5  | 410.98 | 189.51    | -9.26  |
| Mangroves          | Wet-Hot | 6  | 229.03 | 131.69    | -1.58  |
| Mangroves          | Wet-Hot | 7  | 177.11 | 106.45    | -3.30  |
| Mangroves          | Wet-Hot | 8  | 153.63 | 136.09    | -5.96  |
| Mangroves          | Wet-Hot | 9  | 120.04 | 154.01    | -1.27  |
| Mangroves          | Wet-Hot | 10 | 254.00 | 163.27    | -4.10  |
| Mangroves          | Wet-Hot | 11 | 98.83  | 53.81     | -6.10  |
| Mangroves          | Wet-Hot | 12 | 207.55 | 172.75    | -0.41  |

|                    |         |    |         |        |         |
|--------------------|---------|----|---------|--------|---------|
| Mangroves          | Wet-Hot | 13 | 111.29  | 57.90  | -6.67   |
| Mangroves          | Wet-Hot | 14 | 117.96  | 158.86 | -2.81   |
| Mangroves          | Wet-Hot | 15 | 172.60  | 96.69  | -5.32   |
| Saltmarsh          | Wet-Hot | 1  | -8.57   | 5.85   | -5.97   |
| Saltmarsh          | Wet-Hot | 2  | -15.61  | 9.31   | -3.41   |
| Saltmarsh          | Wet-Hot | 3  | -8.65   | 4.25   | -4.24   |
| Saltmarsh          | Wet-Hot | 4  | -12.75  | 7.73   | -4.86   |
| Saltmarsh          | Wet-Hot | 5  | -17.80  | 8.52   | -6.26   |
| Saltmarsh          | Wet-Hot | 6  | -31.07  | 3.28   | -7.51   |
| Saltmarsh          | Wet-Hot | 7  | -23.40  | 4.88   | -1.61   |
| Saltmarsh          | Wet-Hot | 8  | -24.09  | 4.19   | -6.67   |
| Saltmarsh          | Wet-Hot | 9  | -26.89  | 3.12   | -4.18   |
| Saltmarsh          | Wet-Hot | 10 | -31.55  | 3.99   | -8.48   |
| Saltmarsh          | Wet-Hot | 11 | -25.73  | 3.18   | -6.12   |
| Saltmarsh          | Wet-Hot | 12 | -32.44  | 3.23   | -10.06  |
| Saltmarsh          | Wet-Hot | 13 | -30.24  | 3.27   | -6.30   |
| Saltmarsh          | Wet-Hot | 14 | -44.95  | 6.66   | -2.94   |
| Saltmarsh          | Wet-Hot | 15 | -37.26  | 6.59   | -7.46   |
| FW tidal wetland   | Wet-Hot | 1  | 331.22  | 7.13   | 4.31    |
| FW tidal wetland   | Wet-Hot | 2  | 327.10  | 5.75   | 4.59    |
| FW tidal wetland   | Wet-Hot | 3  | 279.86  | 5.90   | 6.18    |
| FW tidal wetland   | Wet-Hot | 4  | 182.69  | 6.93   | 0.30    |
| FW tidal wetland   | Wet-Hot | 5  | 273.37  | 9.36   | 2.62    |
| FW tidal wetland   | Wet-Hot | 6  | 558.51  | 7.01   | 2.38    |
| FW tidal wetland   | Wet-Hot | 7  | 501.67  | 5.29   | 0.99    |
| FW tidal wetland   | Wet-Hot | 8  | 421.57  | 8.39   | 1.33    |
| FW tidal wetland   | Wet-Hot | 9  | 338.42  | 1.52   | 5.78    |
| FW tidal wetland   | Wet-Hot | 10 | 386.81  | 4.86   | 4.22    |
| FW tidal wetland   | Wet-Hot | 11 | 734.25  | 11.77  | 5.04    |
| FW tidal wetland   | Wet-Hot | 12 | 775.55  | 7.19   | 8.84    |
| FW tidal wetland   | Wet-Hot | 13 | 636.64  | 4.80   | 9.66    |
| FW tidal wetland   | Wet-Hot | 14 | 552.14  | 12.15  | 2.97    |
| FW tidal wetland   | Wet-Hot | 15 | 556.49  | 9.32   | 0.68    |
| Sugarcane          | Wet-Hot | 1  | 442.71  | -5.67  | 52.25   |
| Sugarcane          | Wet-Hot | 2  | 440.55  | -3.44  | 55.20   |
| Sugarcane          | Wet-Hot | 3  | 315.90  | -2.65  | 64.68   |
| Sugarcane          | Wet-Hot | 4  | 334.40  | -3.20  | 73.11   |
| Sugarcane          | Wet-Hot | 5  | 304.80  | -3.01  | 49.29   |
| Sugarcane          | Wet-Hot | 6  | 263.65  | -12.37 | 27.16   |
| Sugarcane          | Wet-Hot | 7  | 384.30  | -5.57  | 77.04   |
| Sugarcane          | Wet-Hot | 8  | 313.28  | -10.25 | 69.51   |
| Sugarcane          | Wet-Hot | 9  | 310.01  | -7.04  | 77.07   |
| Sugarcane          | Wet-Hot | 10 | 296.09  | -4.36  | 63.95   |
| Sugarcane          | Wet-Hot | 11 | 99.42   | -4.80  | 17.47   |
| Sugarcane          | Wet-Hot | 12 | 208.02  | -1.00  | 92.02   |
| Sugarcane          | Wet-Hot | 13 | 154.41  | -6.28  | 10.51   |
| Sugarcane          | Wet-Hot | 14 | 242.92  | -3.78  | 38.24   |
| Sugarcane          | Wet-Hot | 15 | 237.91  | -1.08  | 20.29   |
| Dry ponded pasture | Wet-Hot | 1  | 857.71  | 39.89  | 1107.09 |
| Dry ponded pasture | Wet-Hot | 2  | 1094.43 | 92.13  | 1109.65 |
| Dry ponded pasture | Wet-Hot | 3  | 1040.94 | 30.20  | 971.59  |
| Dry ponded pasture | Wet-Hot | 4  | 945.82  | 16.73  | 1072.66 |
| Dry ponded pasture | Wet-Hot | 5  | 560.33  | 41.71  | 942.15  |
| Dry ponded pasture | Wet-Hot | 6  | 1158.08 | 69.92  | 2083.00 |
| Dry ponded pasture | Wet-Hot | 7  | 1229.24 | 100.20 | 1159.77 |
| Dry ponded pasture | Wet-Hot | 8  | 988.38  | 34.81  | 2155.12 |

|                    |         |    |        |          |         |
|--------------------|---------|----|--------|----------|---------|
| Dry ponded pasture | Wet-Hot | 9  | 759.27 | 18.88    | 2101.59 |
| Dry ponded pasture | Wet-Hot | 10 | 626.26 | 30.61    | 1844.24 |
| Dry ponded pasture | Wet-Hot | 11 | 475.54 | 27.35    | 2081.00 |
| Dry ponded pasture | Wet-Hot | 12 | 795.39 | 19.12    | 1789.24 |
| Dry ponded pasture | Wet-Hot | 13 | 897.41 | 11.39    | 1008.19 |
| Dry ponded pasture | Wet-Hot | 14 | 728.94 | 15.65    | 1142.78 |
| Dry ponded pasture | Wet-Hot | 15 | 534.82 | 13.75    | 1150.27 |
| Wet ponded pasture | Wet-Hot | 1  | 143.09 | 11476.01 | 71.91   |
| Wet ponded pasture | Wet-Hot | 2  | 139.91 | 9171.85  | 28.89   |
| Wet ponded pasture | Wet-Hot | 3  | 109.64 | 8836.40  | 46.69   |
| Wet ponded pasture | Wet-Hot | 4  | 81.09  | 8351.20  | 47.71   |
| Wet ponded pasture | Wet-Hot | 5  | 128.53 | 10897.51 | 32.25   |
| Wet ponded pasture | Wet-Hot | 6  | 222.32 | 13743.33 | 16.83   |
| Wet ponded pasture | Wet-Hot | 7  | 146.23 | 7376.51  | 14.89   |
| Wet ponded pasture | Wet-Hot | 8  | 179.95 | 11360.45 | 12.44   |
| Wet ponded pasture | Wet-Hot | 9  | 143.13 | 9457.48  | 16.18   |
| Wet ponded pasture | Wet-Hot | 10 | 135.01 | 9512.04  | 13.46   |
| Wet ponded pasture | Wet-Hot | 11 | 128.38 | 11210.00 | 16.02   |
| Wet ponded pasture | Wet-Hot | 12 | 146.68 | 12289.67 | 8.96    |
| Wet ponded pasture | Wet-Hot | 13 | 142.43 | 10170.75 | 12.39   |
| Wet ponded pasture | Wet-Hot | 14 | 108.85 | 12721.08 | 17.51   |
| Wet ponded pasture | Wet-Hot | 15 | 137.86 | 15532.15 | 18.83   |
