# Supplementary material for: Greenhouse gas emissions from tropical coastal wetlands and their alternative agricultural lands: Where significant mitigation gains lie
Source: Copernicus journal article supplement (doi:10.5194/bg-2021-28), 2021-03-19
Supplement: Supplementary file [file bg-2021-28-AC2-supplement.pdf]

# Greenhouse gas emissions from tropical coastal wetlands and their alternative agricultural lands: Where significant mitigation gains lie

Supplementary data file 2 Linearity test results for Dry-hot season

Iram et al. 2021

Correspondence: naima.iram@griffithuni.edu.au

## Mangroves- CO2

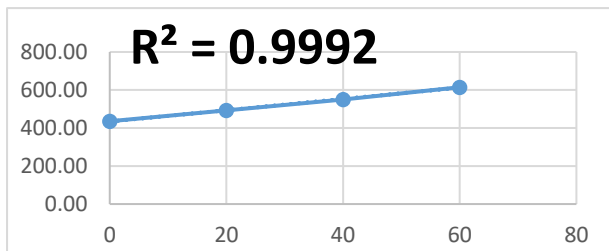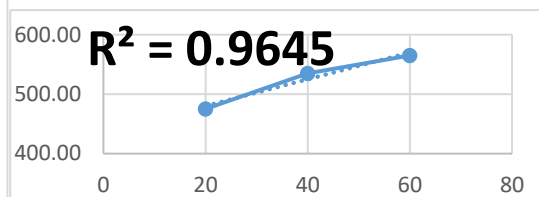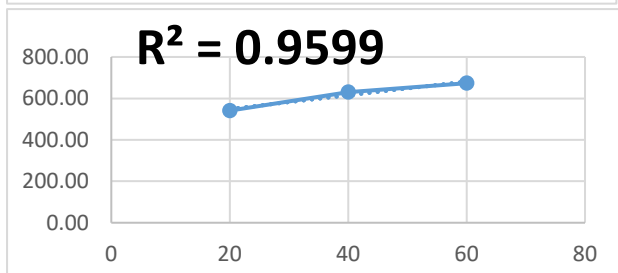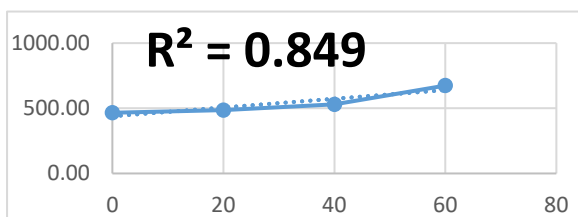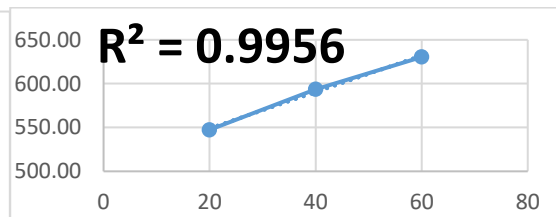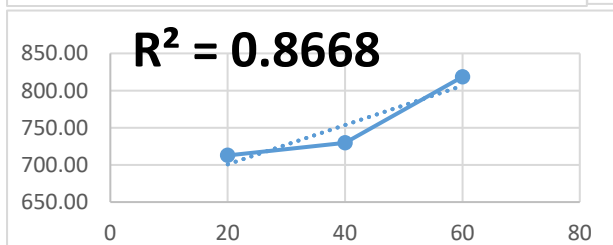

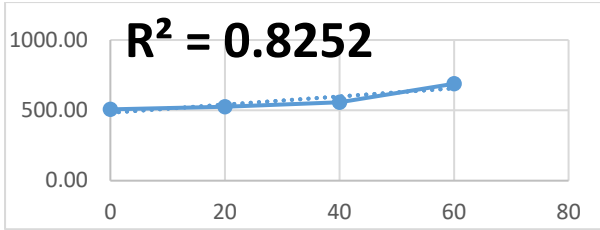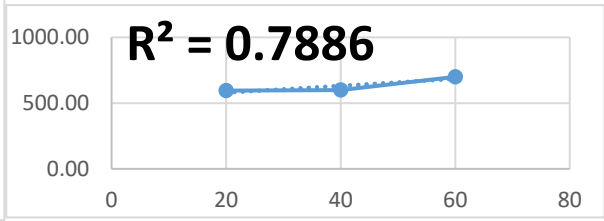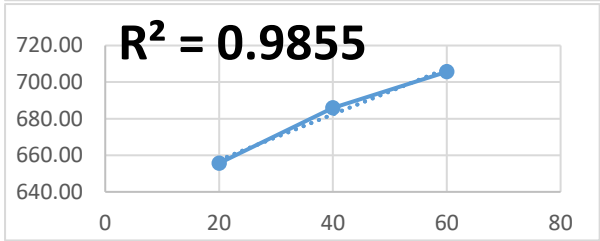

**Mangroves- CH4**

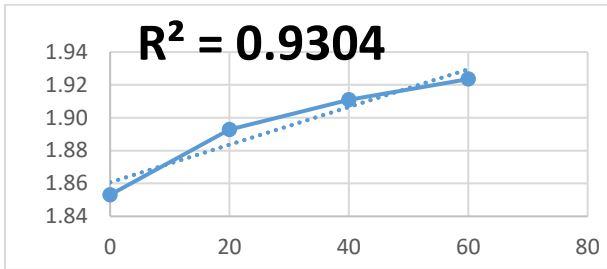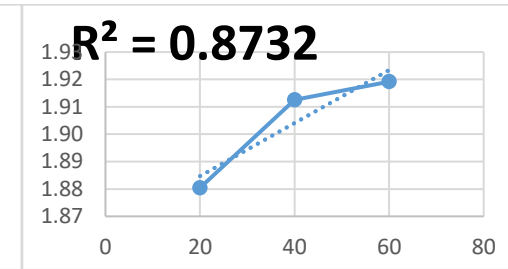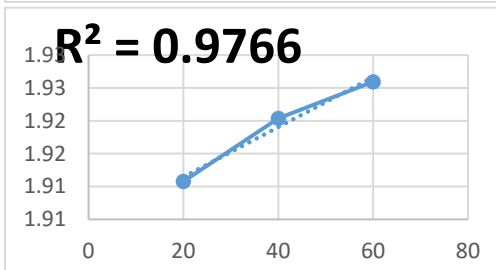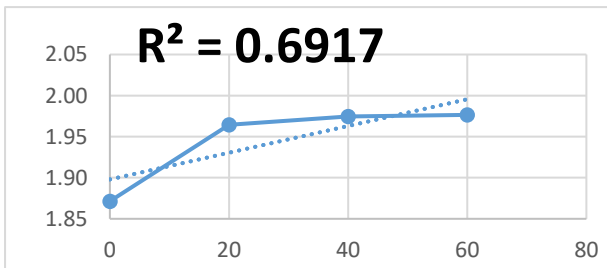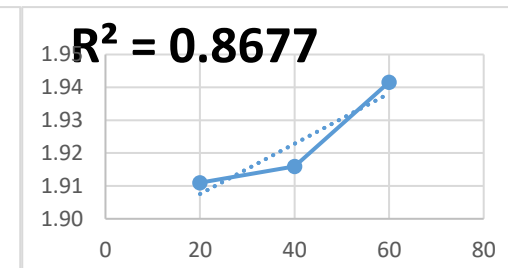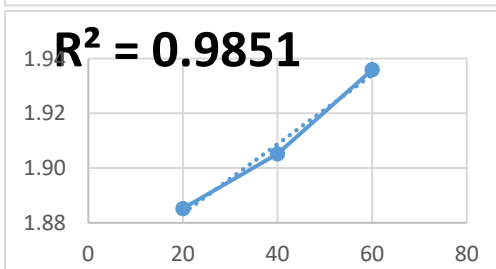

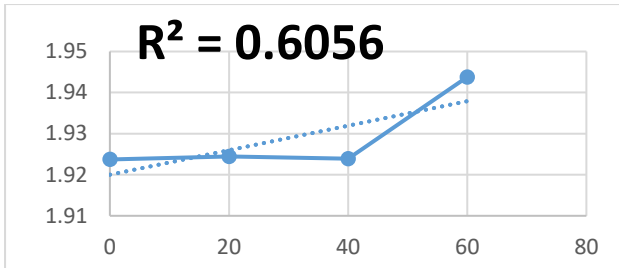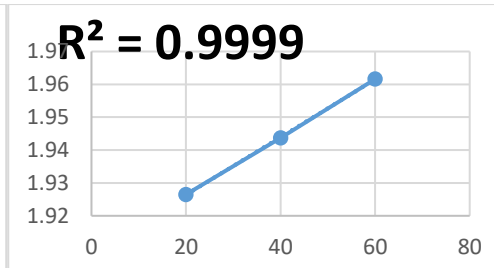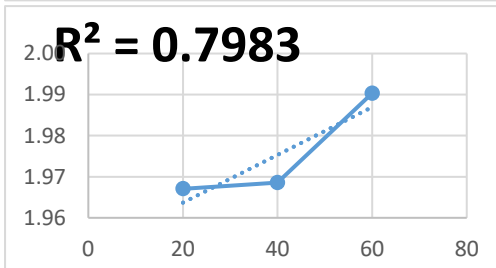

**Mangroves- N2O**

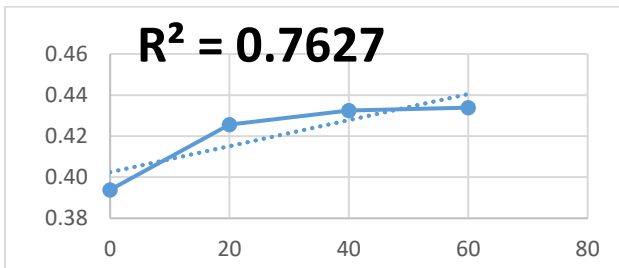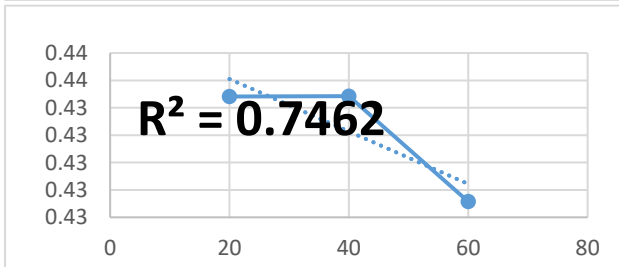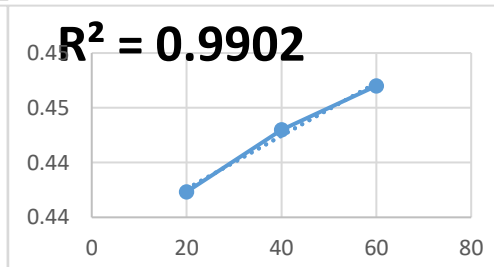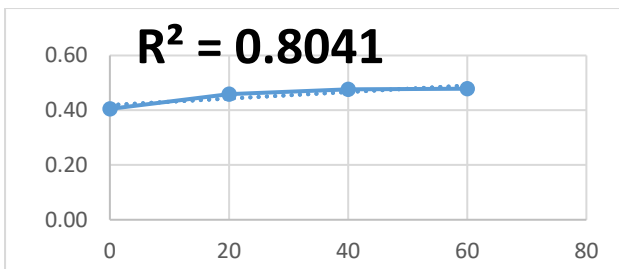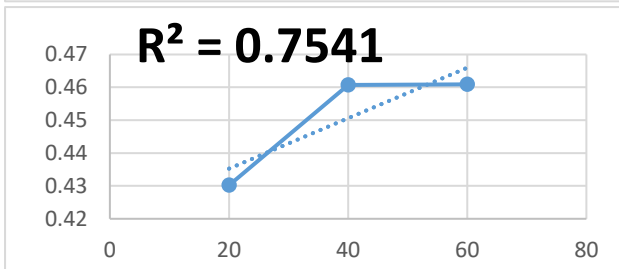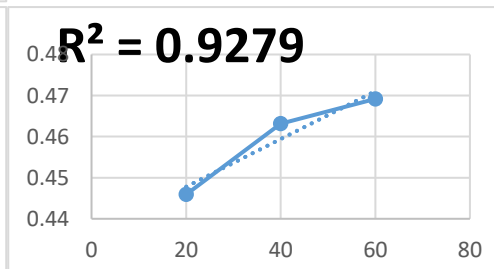

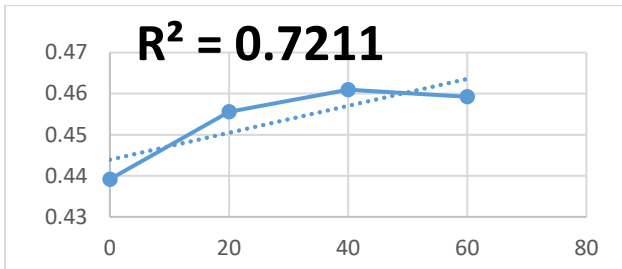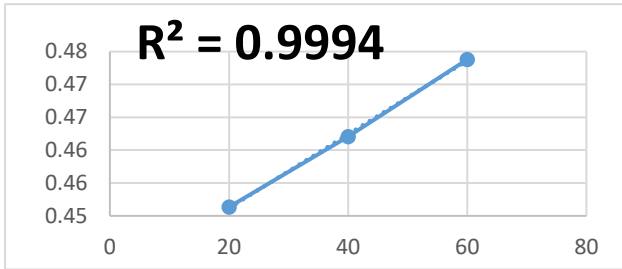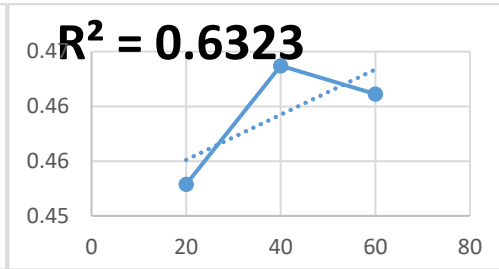

**Saltmarsh- CO2**

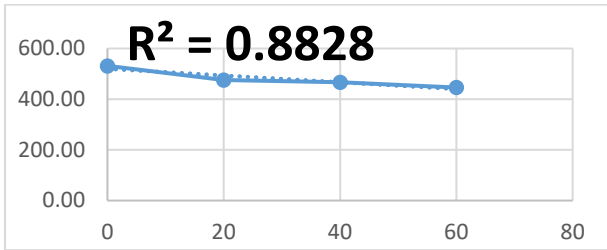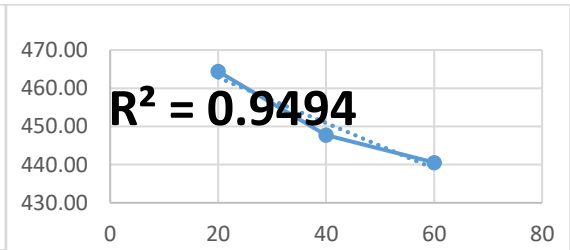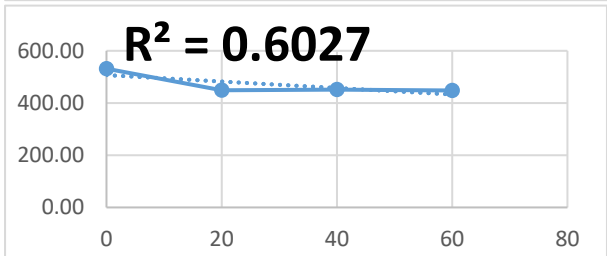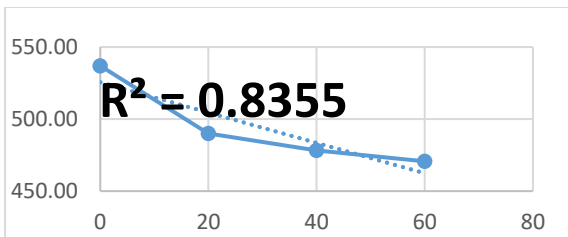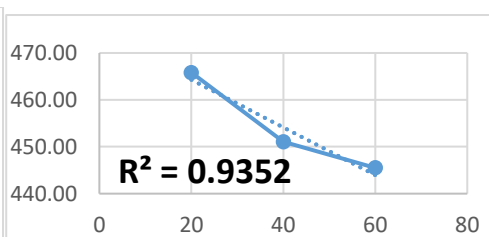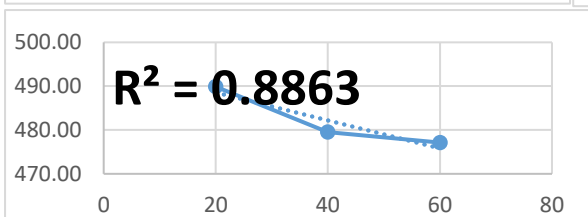

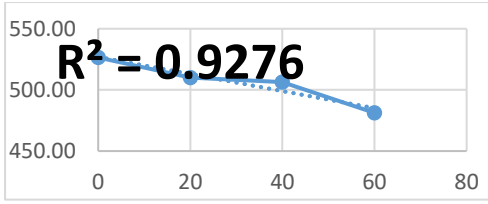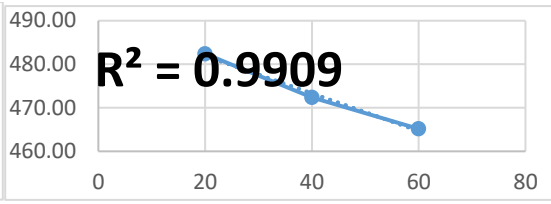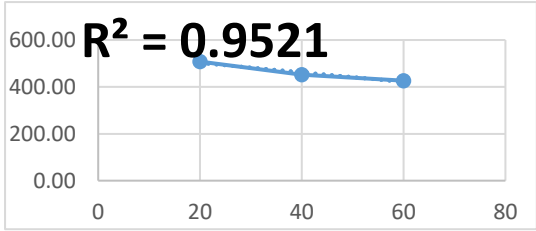

**Saltmarsh- CH4**

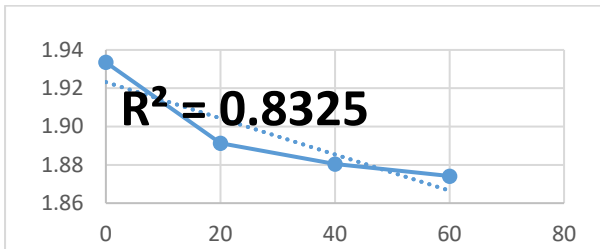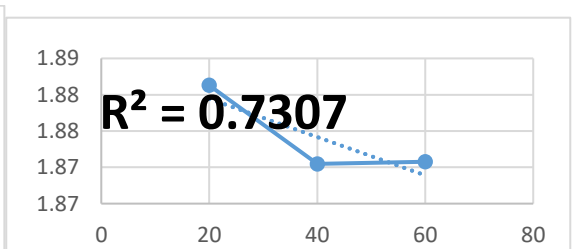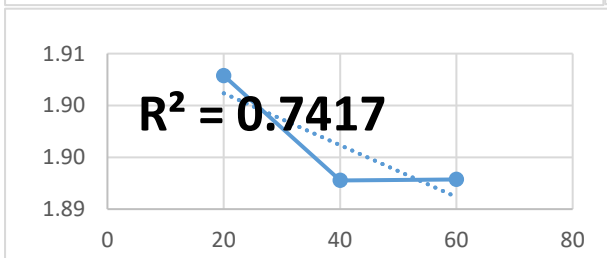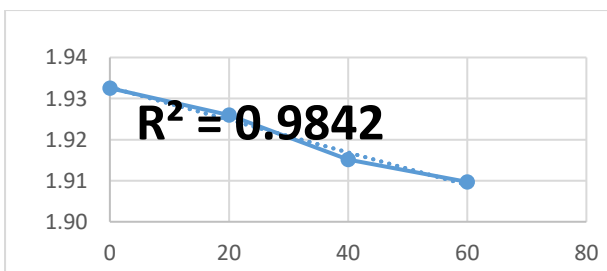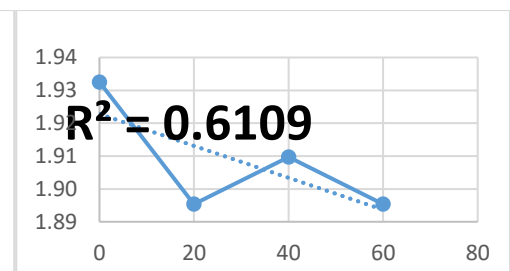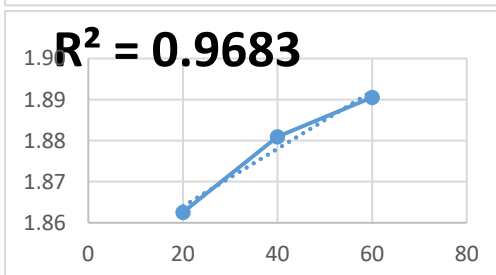

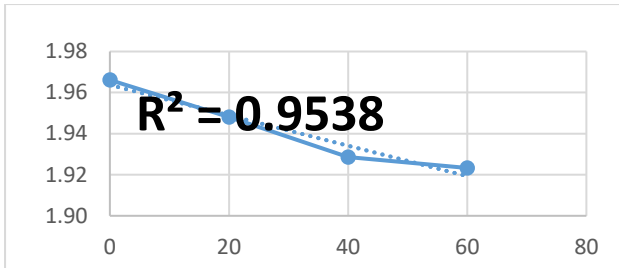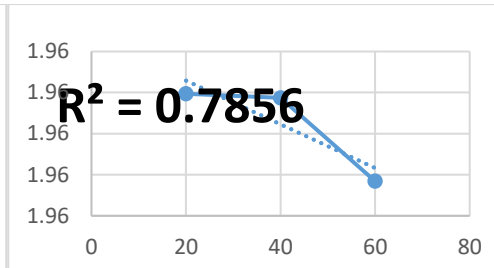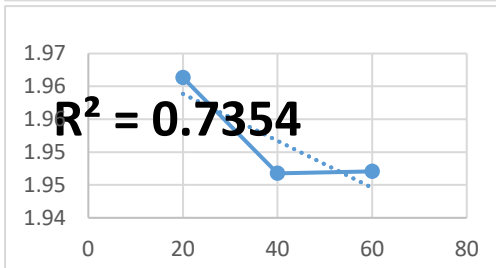

Saltmarsh- N2O

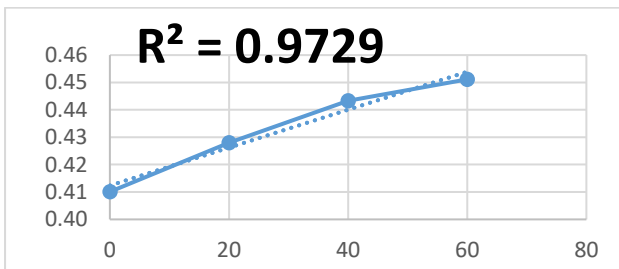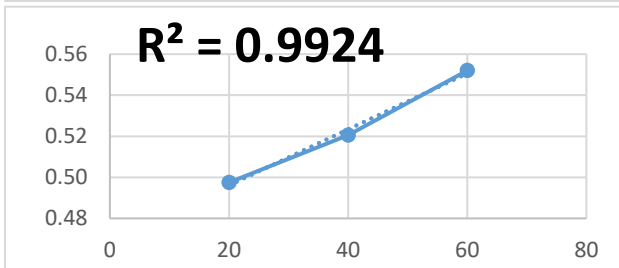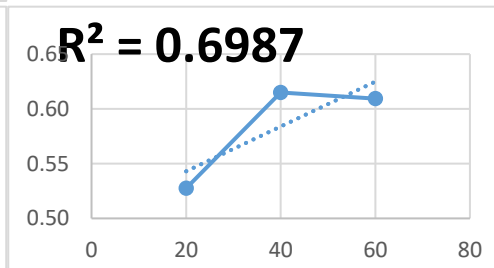

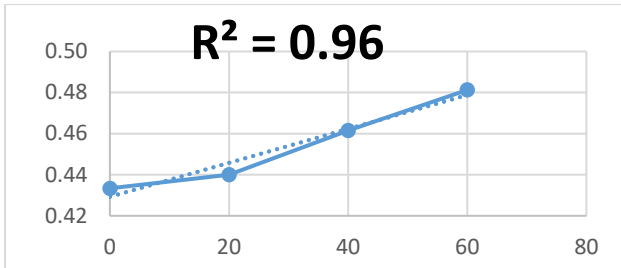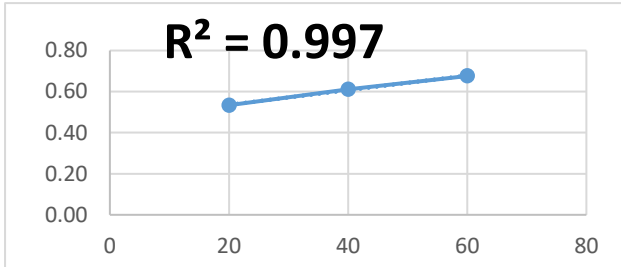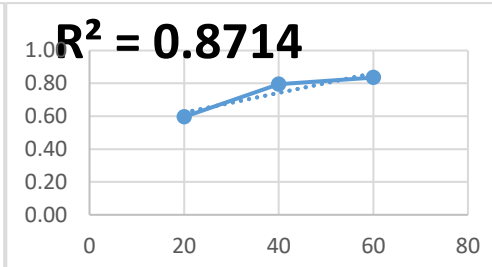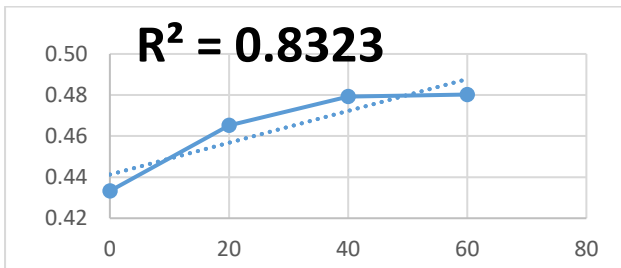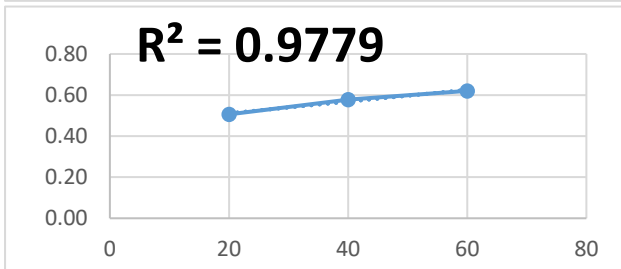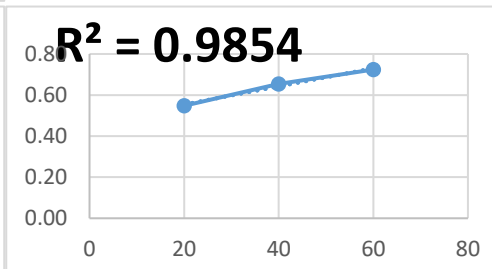

**Freshwater tidal forest-CO2**

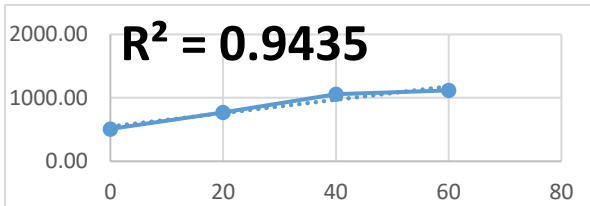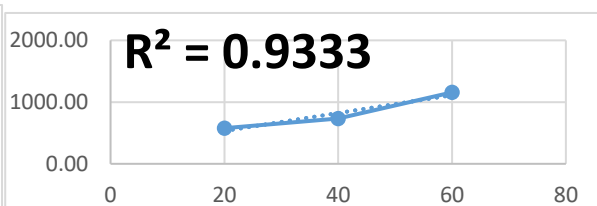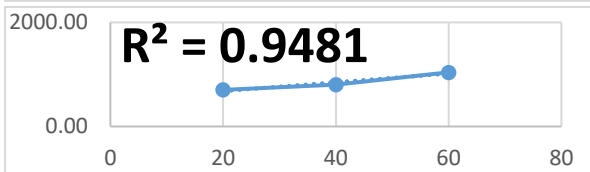

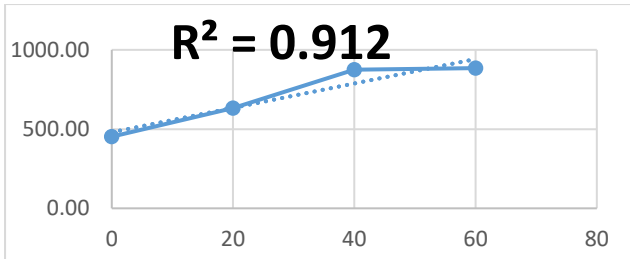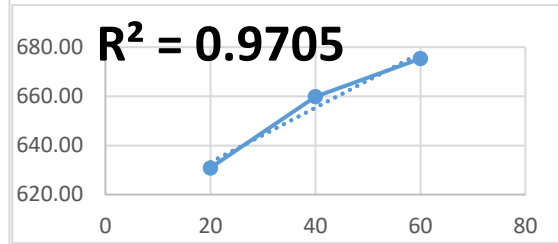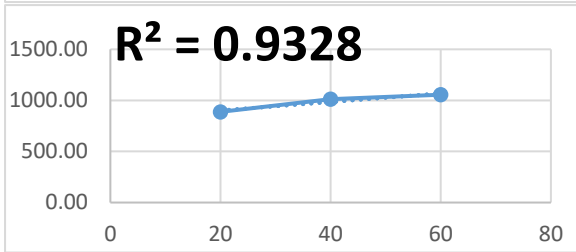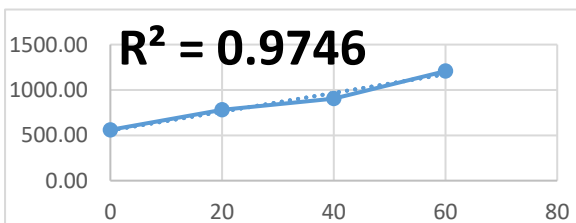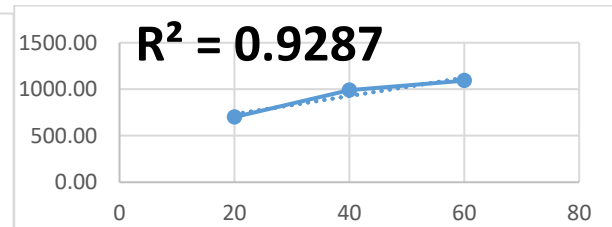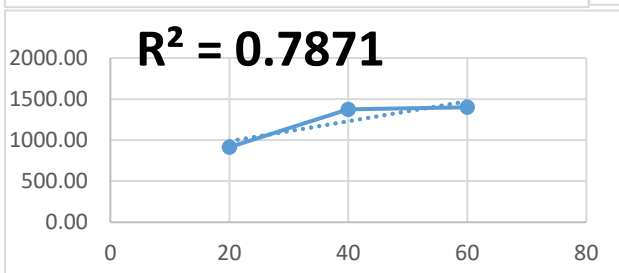

**Freshwater tidal forest-CH4**



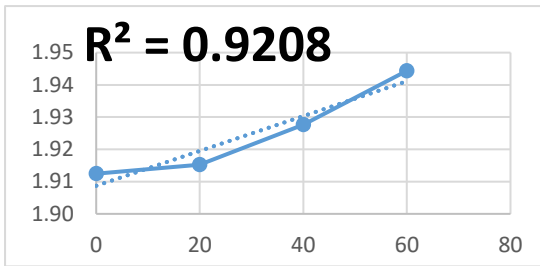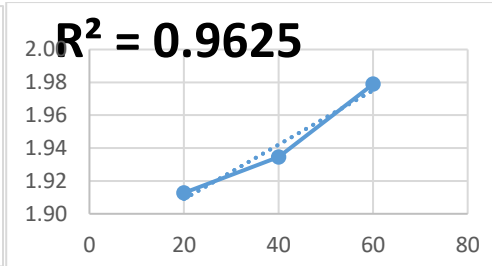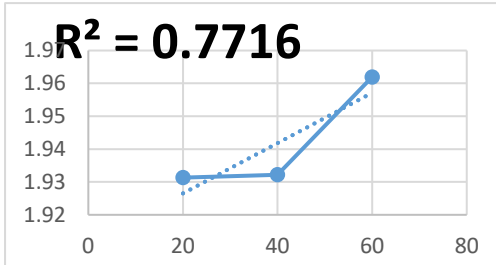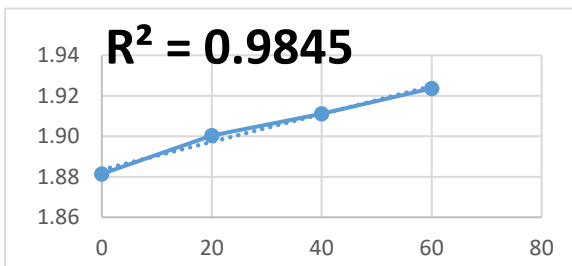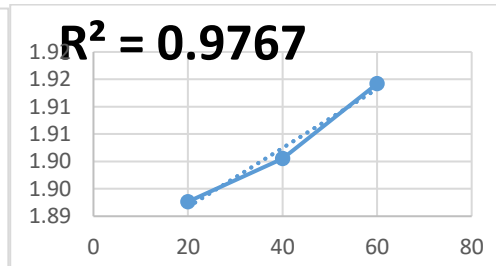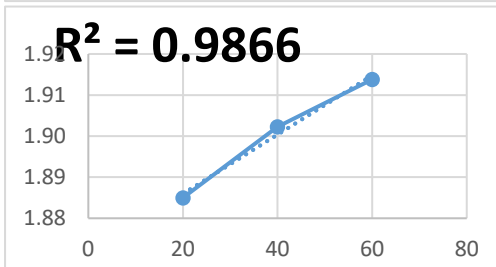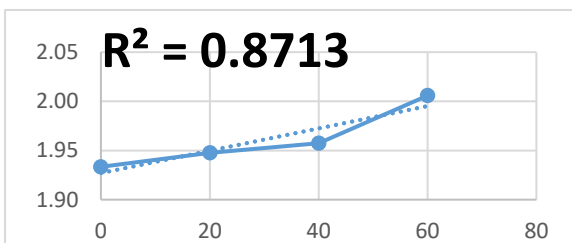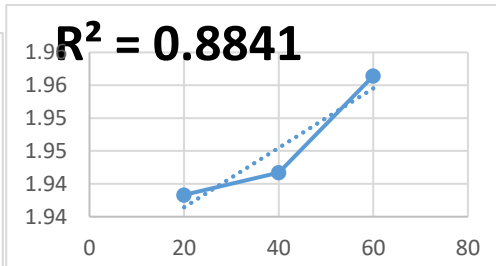

**Freshwater tidal forest-N2O**

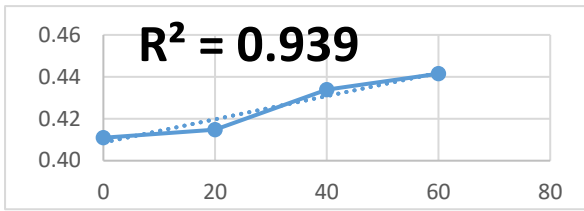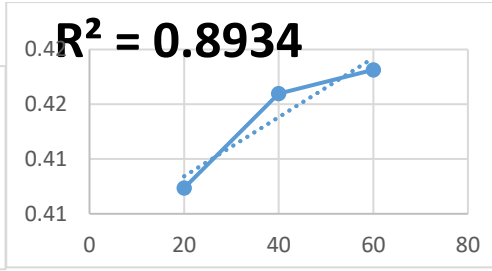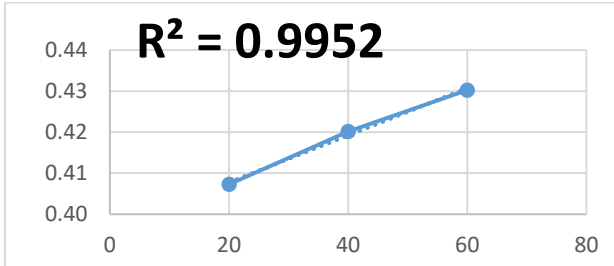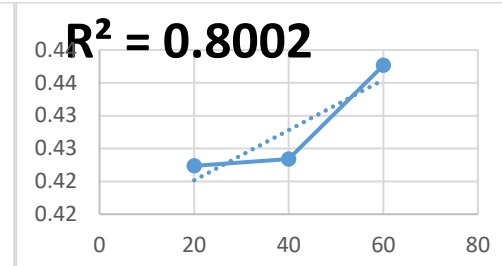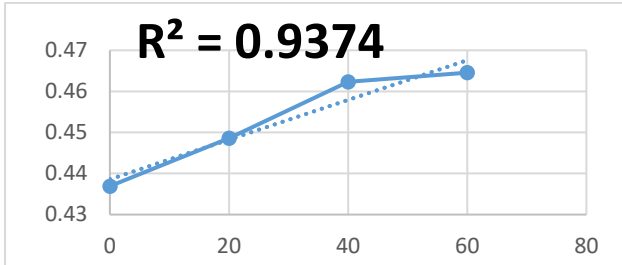

**Sugarcane- CO2**

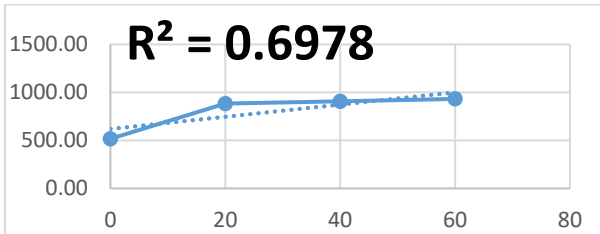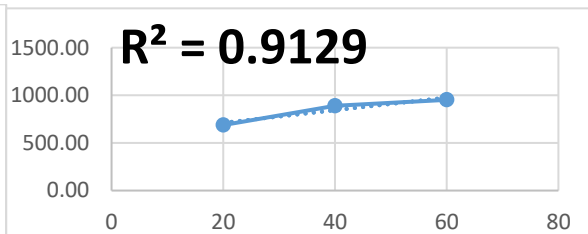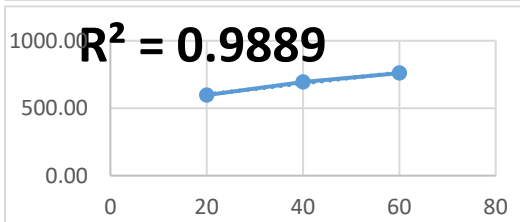

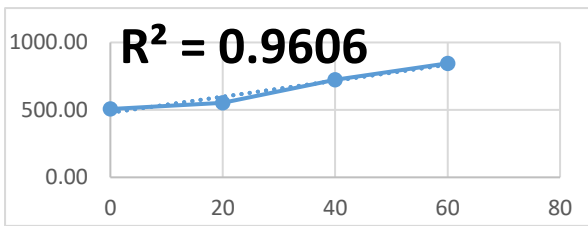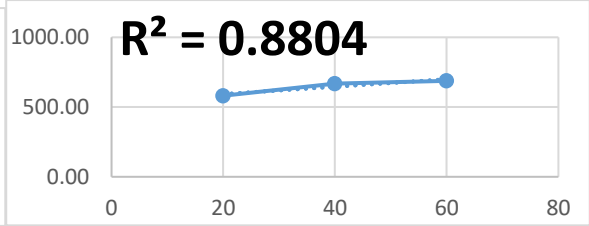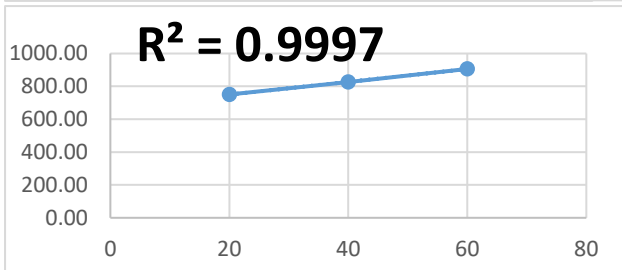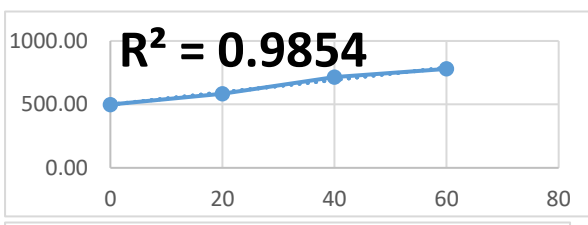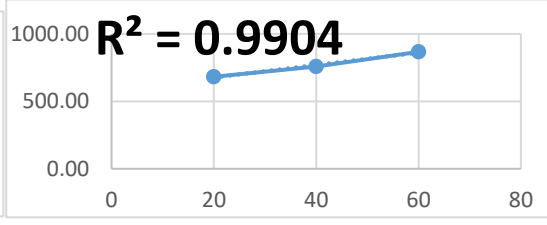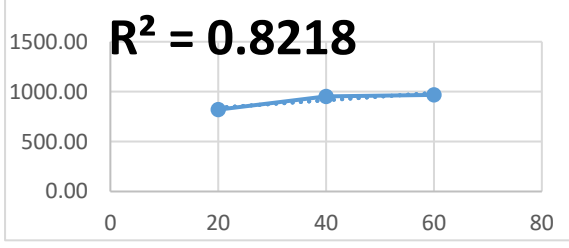

**Sugarcane- CH4**

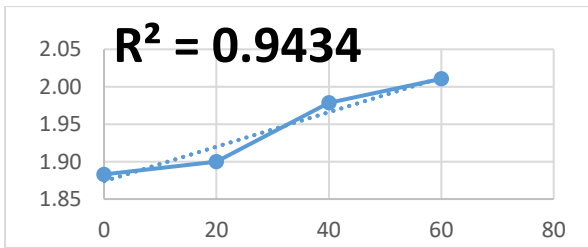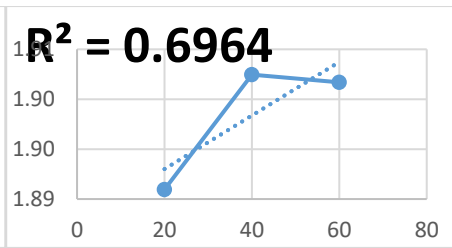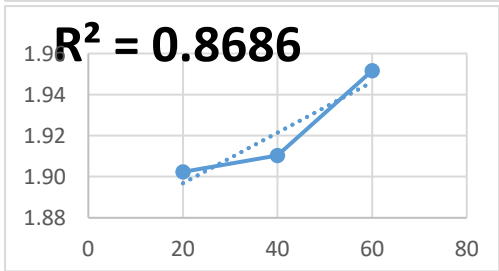

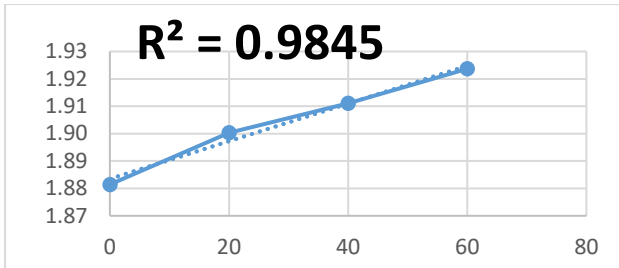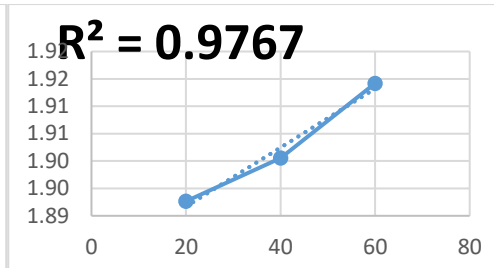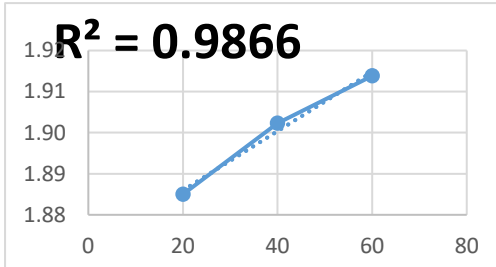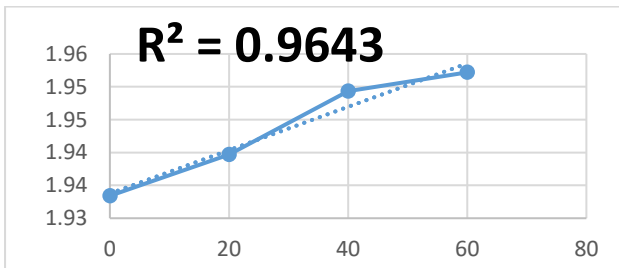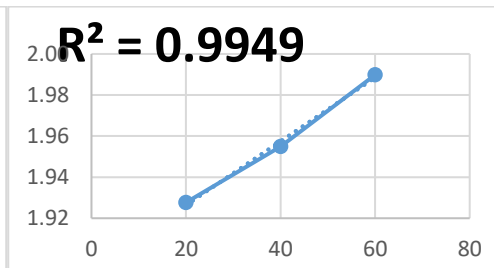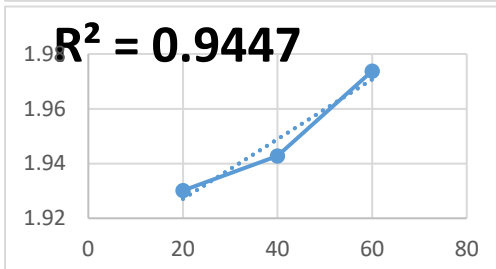

**Sugarcane- N2O**

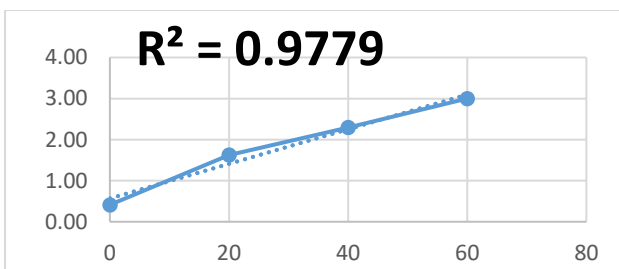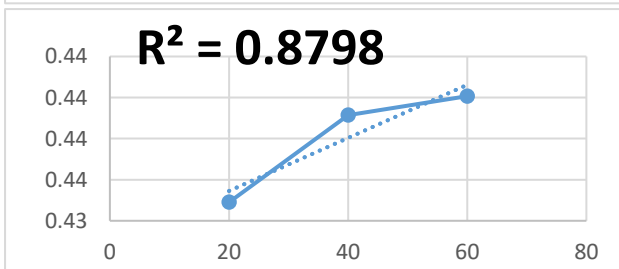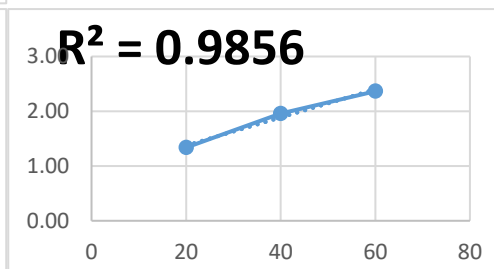

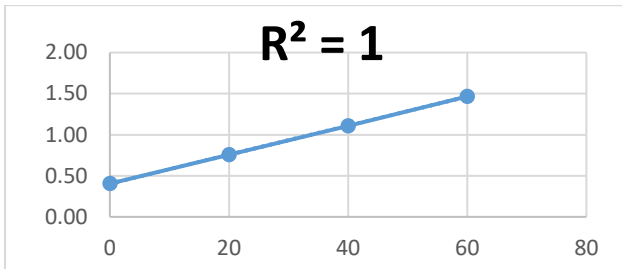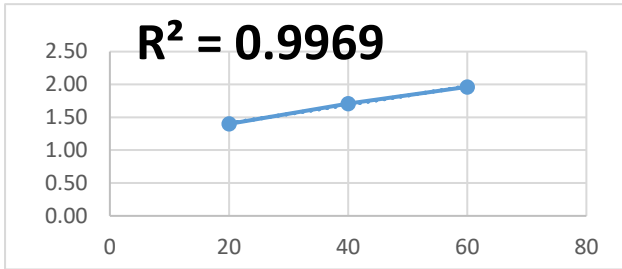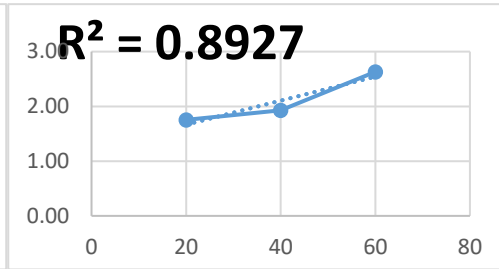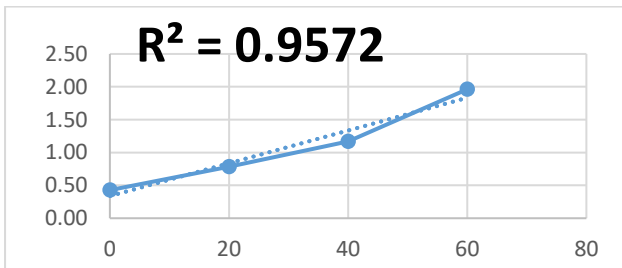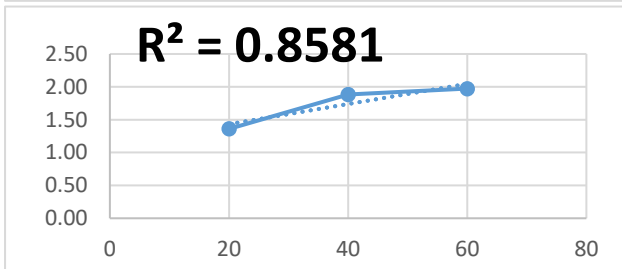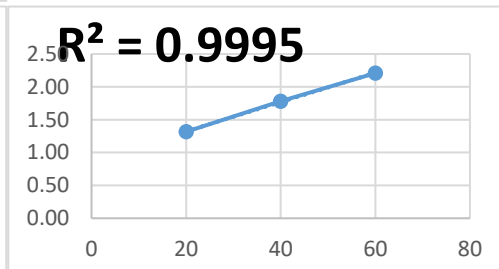

**Wet ponded pasture-CO2**

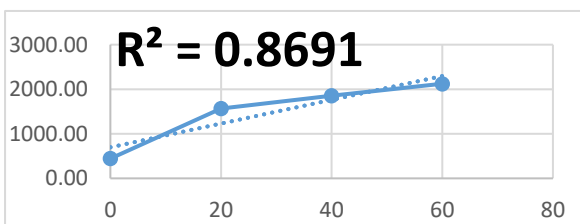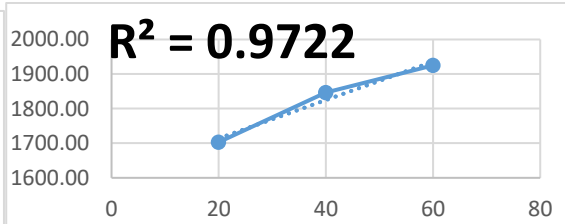

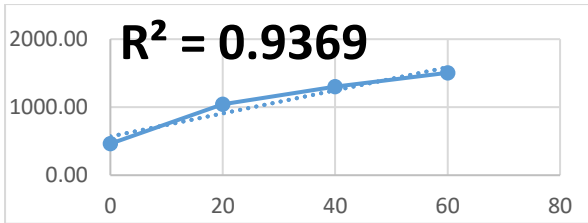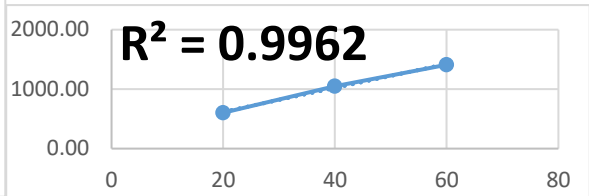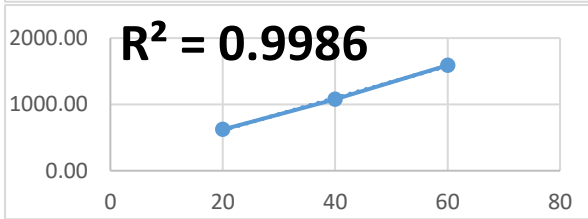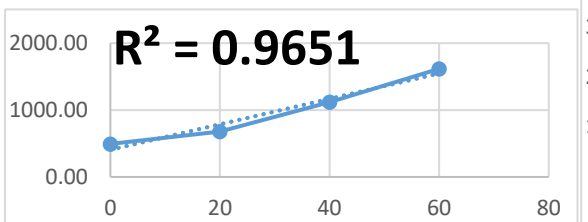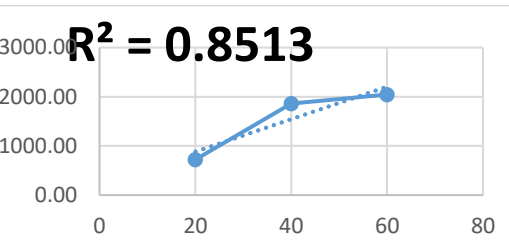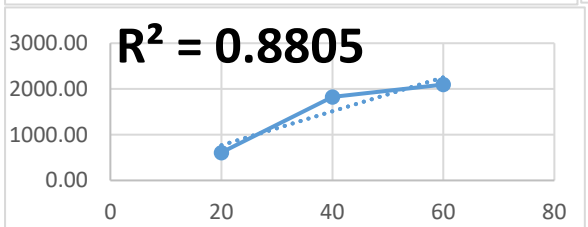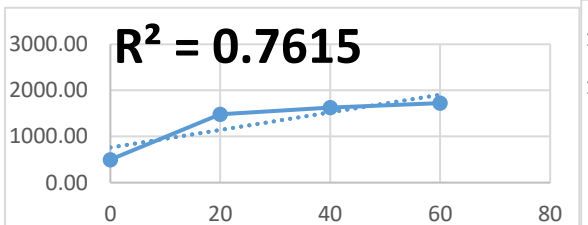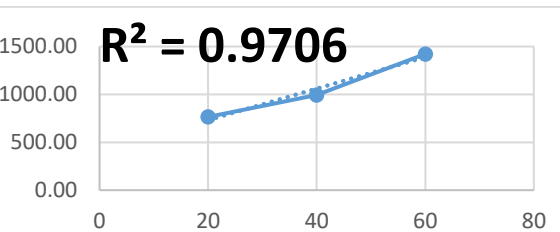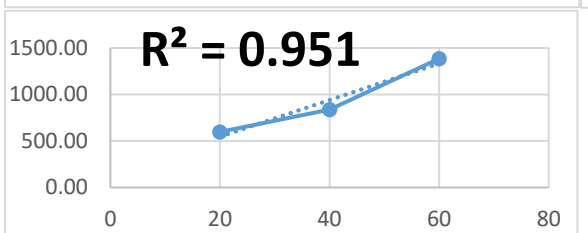

**Wet ponded pasture-CH4**

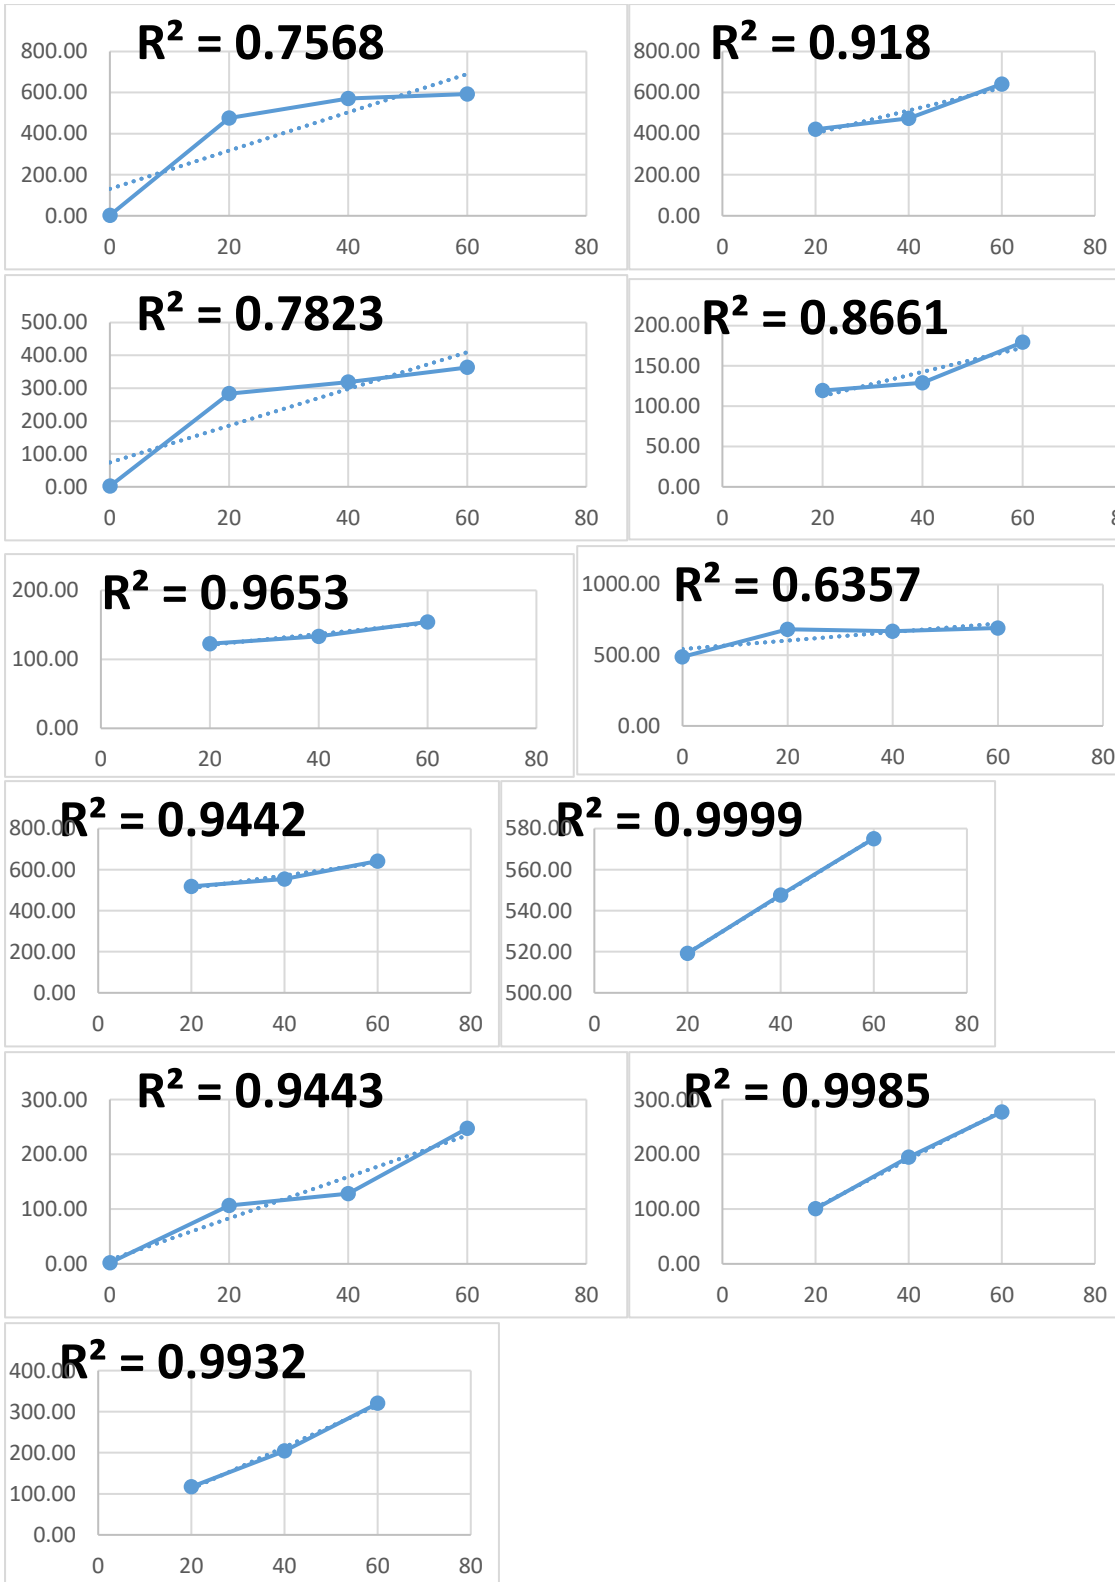

Wet ponded pasture-N2O

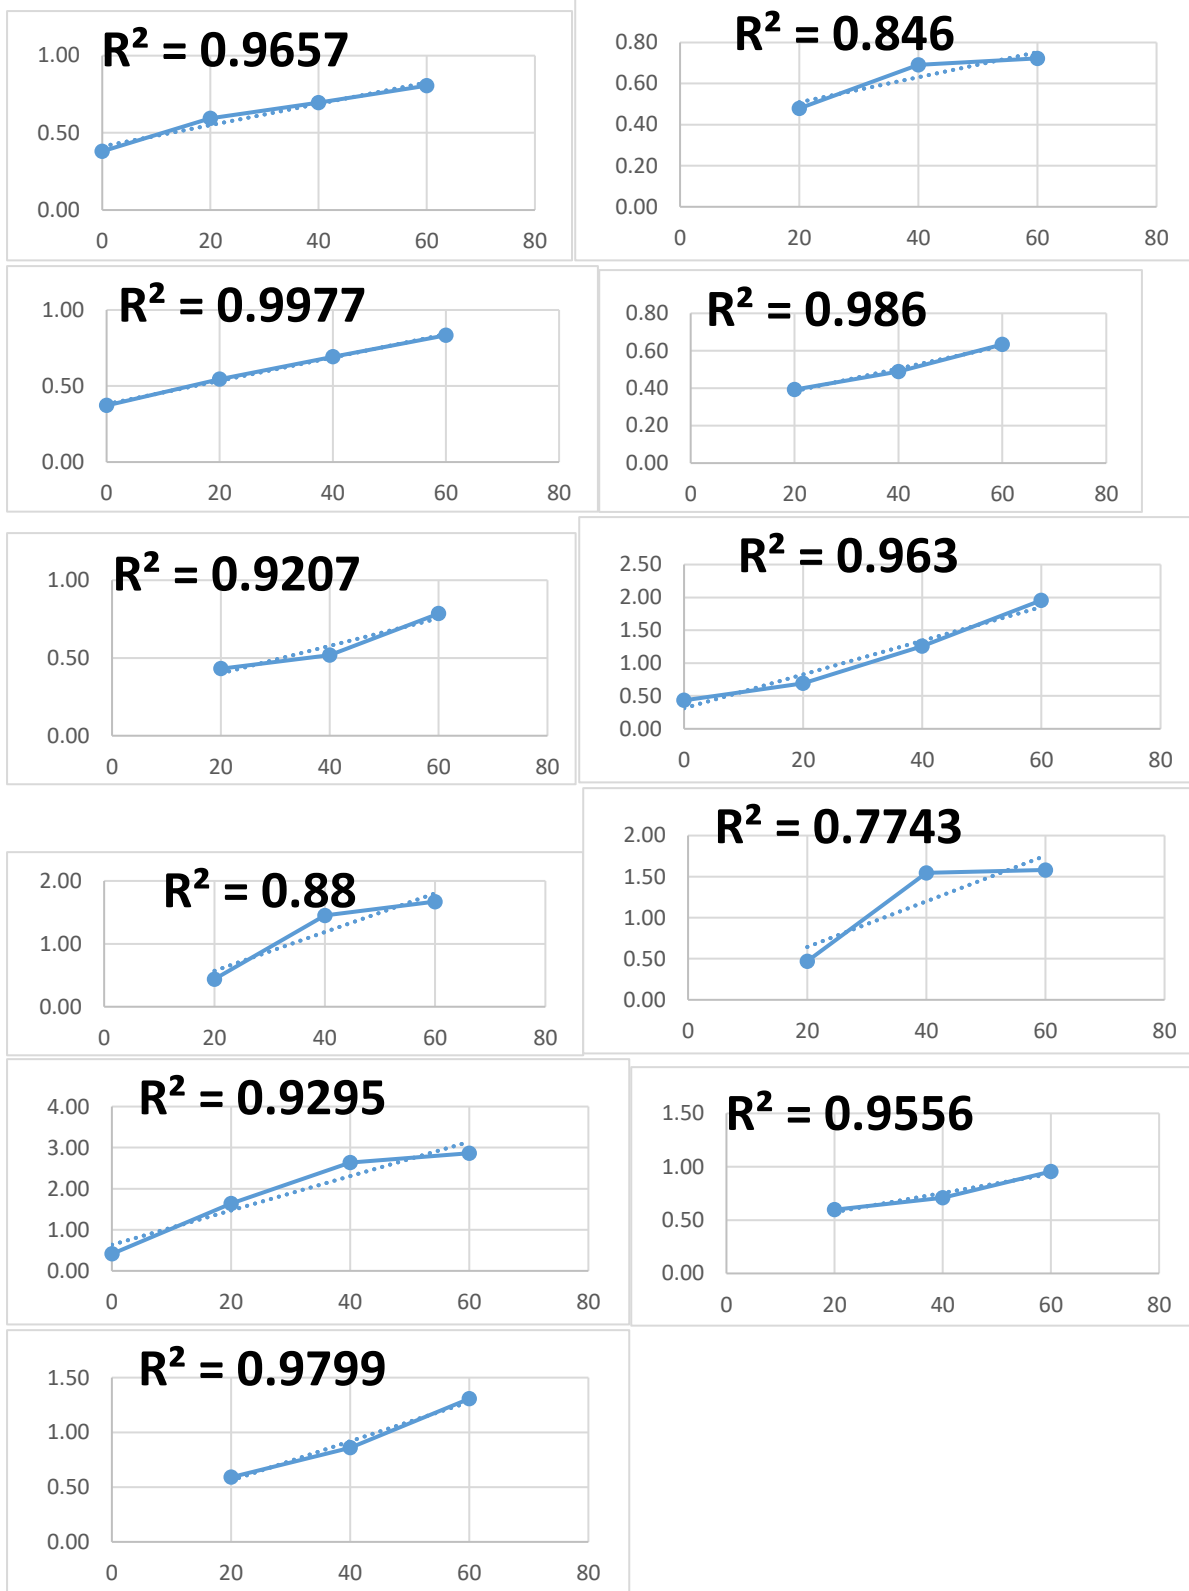

**Dry ponded pasture-CO2**



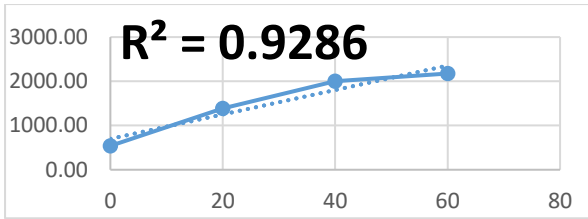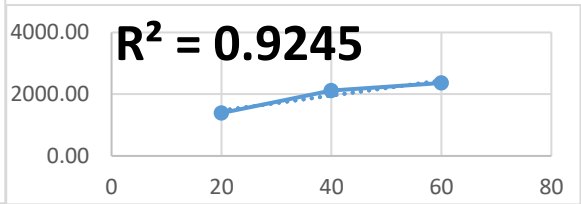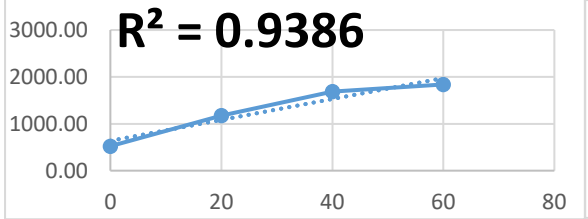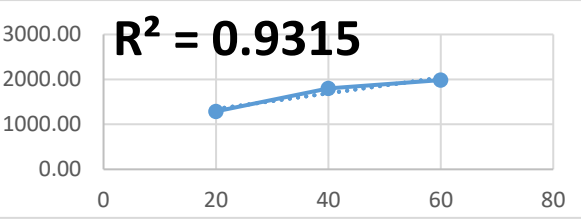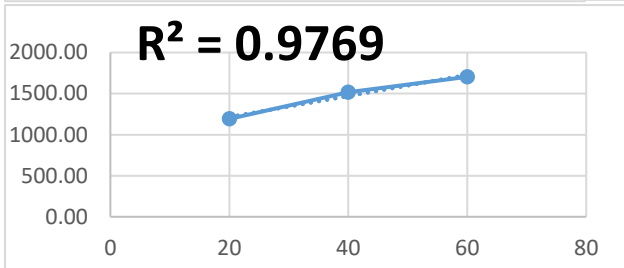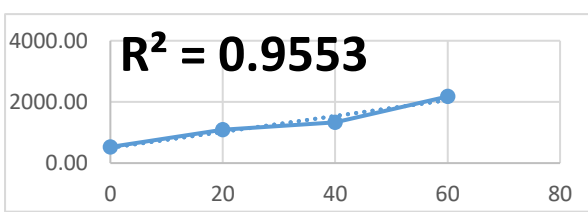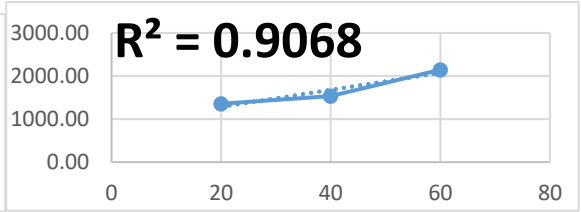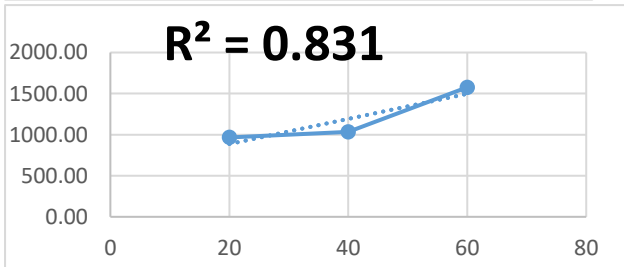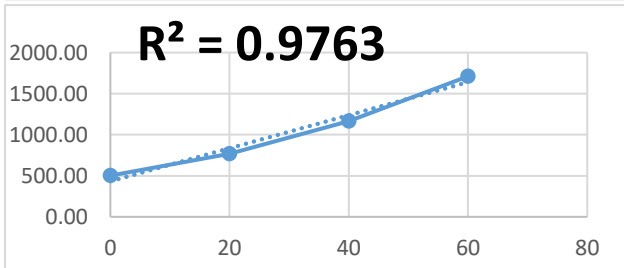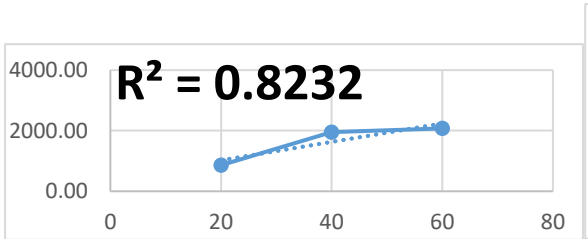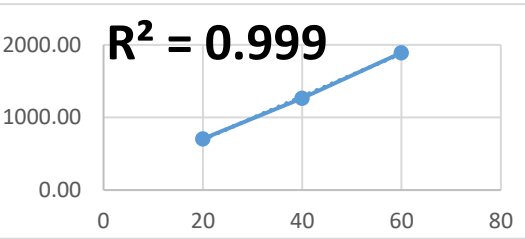

**Dry ponded pasture-CH4**

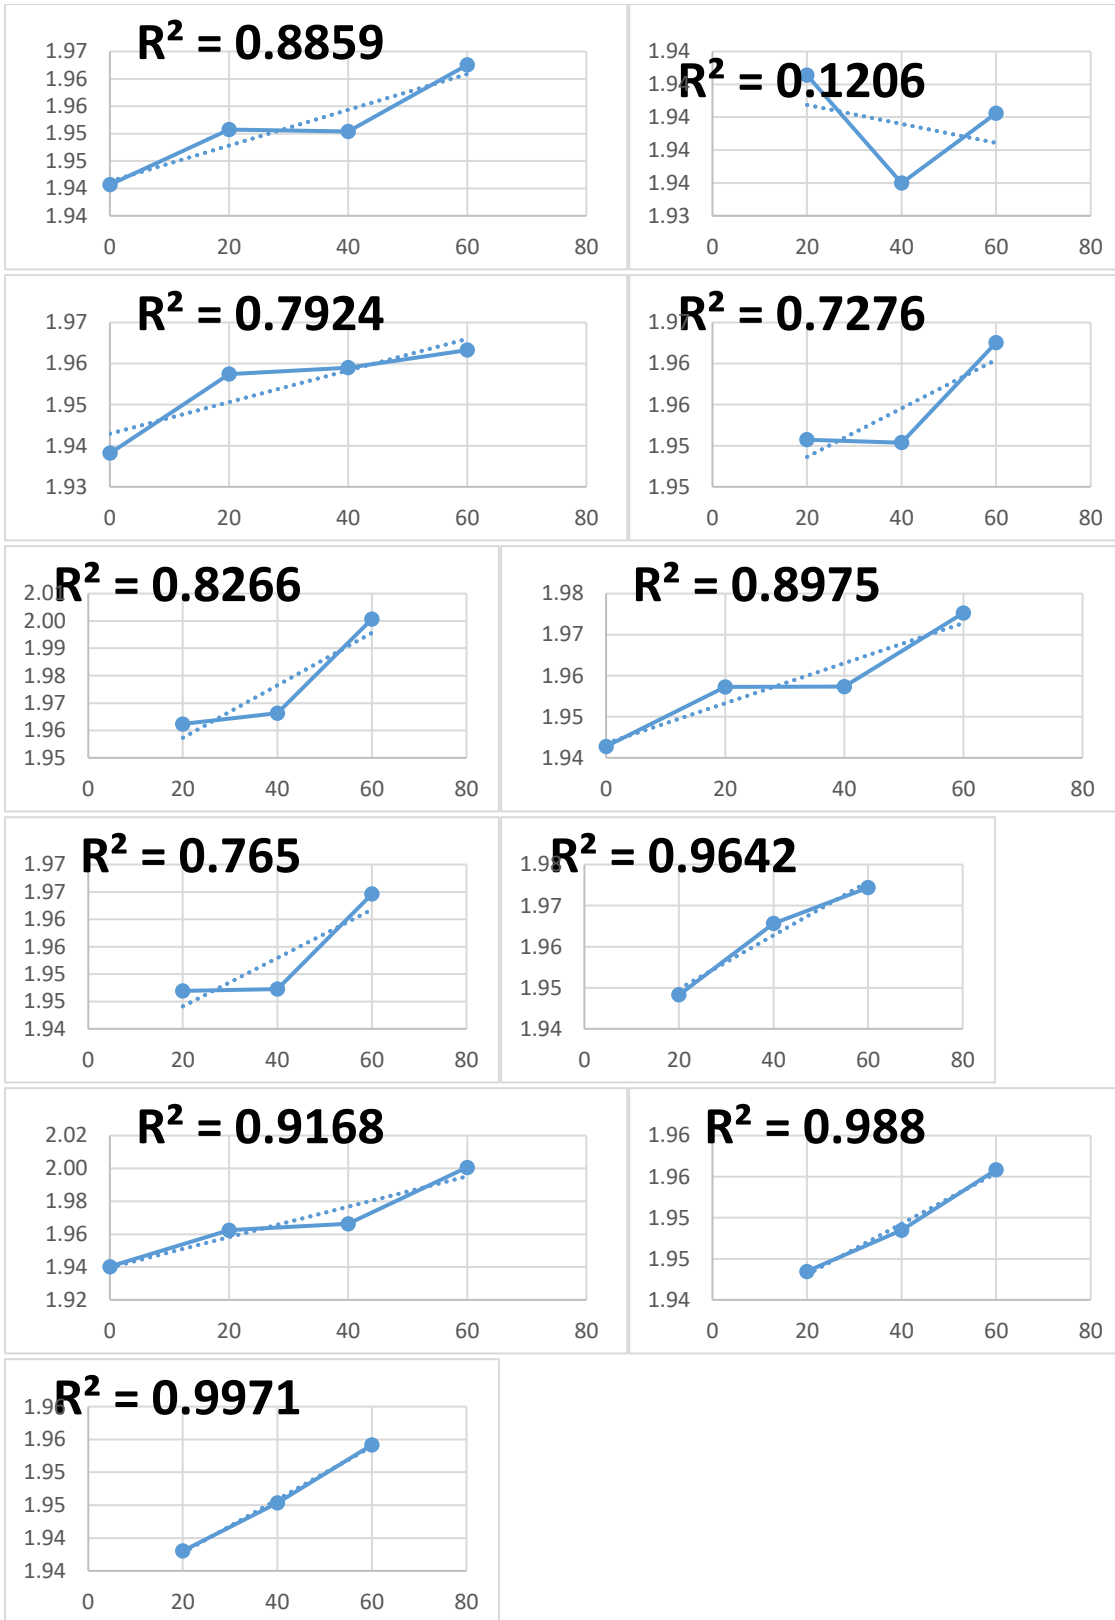

Dry ponded pasture-N2O

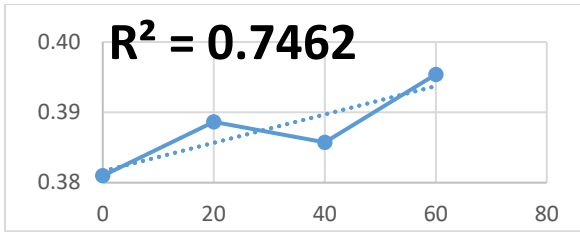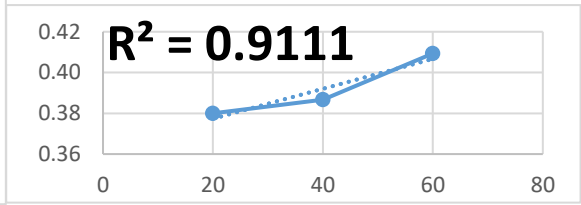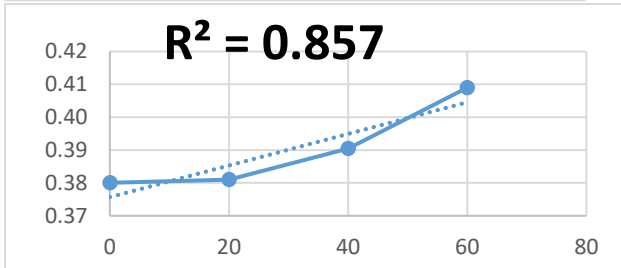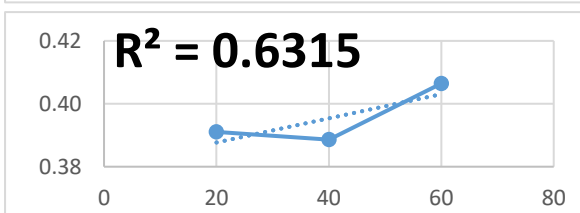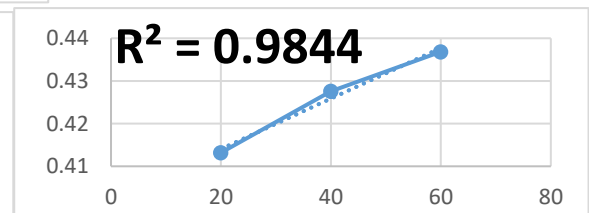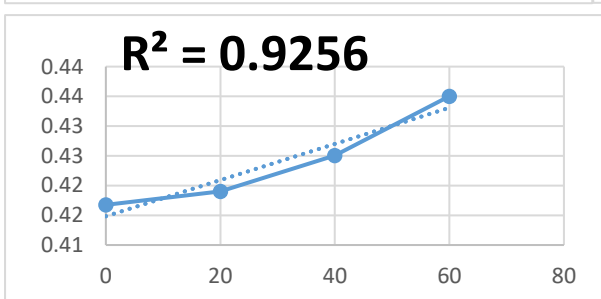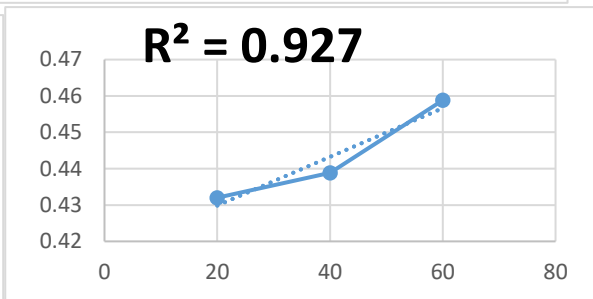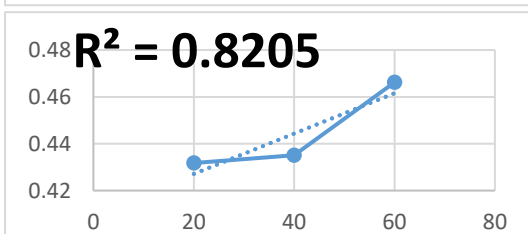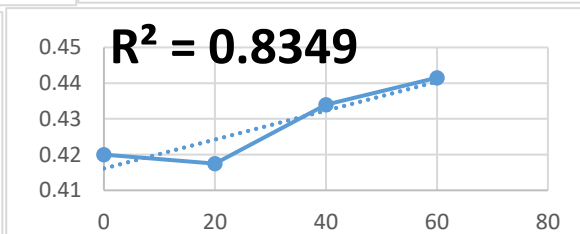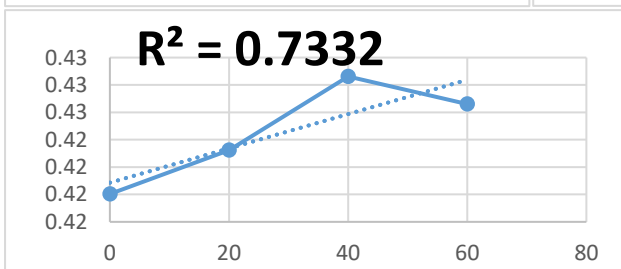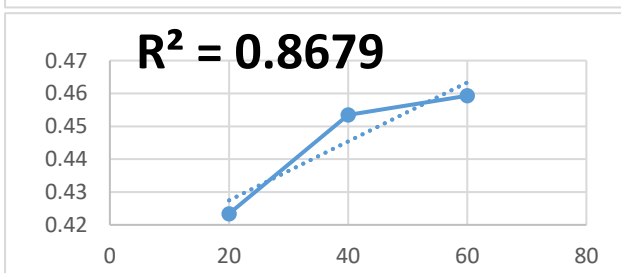



### Greenhouse gas emissions from tropical coastal wetlands and their alternative agricultural lands: Where significant mitigation gains lie

Iram et al. 2021  
 Correspondence to: [Naima.Iram@unimelb.edu.au](mailto:Naima.Iram@unimelb.edu.au)

40 years climate data on mean maximum temperature and rainfall from Bureau of Meteorology Australia.

Monthly Climate Statistics for "LUCINDA POINT" [032141]  
 Created on: 16 May 2021 14:44:52 GMT+0800

Source: <http://www.bom.gov.au/jsp/ncs/cdo/cvq/cv>

032141 LUCINDA POINT  
 Commenced: 1980  
 Last Record: 2021  
 Latitude: 18.52 Degrees South  
 Longitude: 146.39 Degrees East  
 Elevation: 10 m  
 State: QLD

| Statistic Element                                                           | January   | February  | March     | April     | May       | June      | July      | August    | September | October   | November  | December  | Annual    | Number of | Start Year | End Year |
|-----------------------------------------------------------------------------|-----------|-----------|-----------|-----------|-----------|-----------|-----------|-----------|-----------|-----------|-----------|-----------|-----------|-----------|------------|----------|
| Mean maximum temperature (Degrees C) for years 1980 to 2021                 | 30.1      | 30.3      | 29.7      | 27.9      | 25.9      | 23.8      | 23.1      | 23.9      | 25.8      | 27        | 28.4      | 29.6      | 27.1      | 32        | 1980       | 2021     |
| Highest temperature (Degrees C) for years 1980 to 2021                      | 37        | 38.5      | 35.9      | 33.1      | 31        | 29.9      | 28.4      | 29.5      | 32.5      | 31        | 34.4      | 37        | 38.5      | 32        | 1980       | 2021     |
| Date of Highest temperature for years 1980 to 2021                          | 7-Jan-84  | 20-Feb-19 | 1-Mar-81  | 14-Apr-81 | 12-May-92 | 1-Jun-81  | 27-Jul-98 | 18-Aug-81 | 22-Sep-86 | 20-Oct-86 | 28-Nov-18 | 6-Dec-91  | 20-Feb-19 | N/A       | 1980       | 2021     |
| Lowest maximum temperature (Degrees C) for years 1980 to 2021               | 25.2      | 24.7      | 25.5      | 23.2      | 17.3      | 17.8      | 17.5      | 19.4      | 22.2      | 22.6      | 23.9      | 25.8      | 17.3      | 32        | 1980       | 2021     |
| Date of Lowest maximum temperature for years 1980 to 2021                   | 13-Jan-81 | 20-Feb-21 | 4-Mar-88  | 30-Apr-82 | 23-May-20 | 21-Jun-07 | 15-Jul-16 | 14-Aug-05 | 1-Sep-86  | 21-Oct-10 | 27-Nov-09 | 24-Dec-99 | 25-May-20 | N/A       | 1980       | 2021     |
| Decile 1 maximum temperature (Degrees C) for years 1980 to 2021             | 28.5      | 28.2      | 27.9      | 26.2      | 24.2      | 23.8      | 23.4      | 22        | 23.9      | 25.4      | 28.9      | 28.1      | 28.1      | 30        | 1980       | 2021     |
| Decile 9 maximum temperature (Degrees C) for years 1980 to 2021             | 32        | 32.3      | 31.8      | 29.9      | 28        | 25.9      | 25        | 26.1      | 28        | 28.7      | 29.9      | 31.4      | 31.4      | 30        | 1980       | 2021     |
| Mean number of days >= 30 Degrees C for years 1980 to 2021                  | 14.3      | 14        | 10.6      | 2.2       | 0.1       | 0         | 0         | 0         | 0.2       | 0.2       | 2.5       | 10        | 54.1      | 32        | 1980       | 2021     |
| Mean number of days >= 35 Degrees C for years 1980 to 2021                  | 0.1       | 0.4       | 0.1       | 0         | 0         | 0         | 0         | 0         | 0         | 0         | 0         | 0         | 0.1       | 32        | 1980       | 2021     |
| Mean number of days >= 40 Degrees C for years 1980 to 2021                  | 0         | 0         | 0         | 0         | 0         | 0         | 0         | 0         | 0         | 0         | 0         | 0         | 0         | 32        | 1980       | 2021     |
| Mean minimum temperature (Degrees C) for years 1980 to 2021                 | 25.3      | 25.2      | 24.8      | 23.4      | 21.3      | 19        | 18.1      | 18.9      | 20.9      | 22.9      | 24.2      | 25.3      | 22.4      | 32        | 1980       | 2021     |
| Lowest temperature (Degrees C) for years 1980 to 2021                       | 18.7      | 18.7      | 21        | 16.7      | 13.9      | 11.7      | 11.2      | 12.5      | 13        | 17        | 20.4      | 20.3      | 11.2      | 32        | 1980       | 2021     |
| Date of Lowest temperature for years 1980 to 2021                           | 25-Jan-86 | 4-Feb-15  | 12-Mar-03 | 24-Apr-03 | 24-May-20 | 24-Jun-82 | 20-Jul-85 | 2-Aug-03  | 26-Sep-96 | 6-Oct-93  | 4-Nov-09  | 24-Dec-85 | 20-Jul-85 | N/A       | 1980       | 2021     |
| Highest minimum temperature (Degrees C) for years 1980 to 2021              | 29        | 29.2      | 28.8      | 27.3      | 26        | 23.6      | 23.1      | 23.6      | 25.4      | 26.4      | 28.5      | 29.1      | 29.2      | 32        | 1980       | 2021     |
| Date of Highest minimum temperature for years 1980 to 2021                  | 11-Jan-83 | 14-Feb-17 | 30-Mar-17 | 8-Apr-83  | 8-May-96  | 15-Jun-20 | 21-Jul-98 | 22-Aug-10 | 29-Sep-16 | 27-Oct-05 | 28-Nov-18 | 20-Dec-05 | 14-Feb-17 | N/A       | 1980       | 2021     |
| Decile 1 minimum temperature (Degrees C) for years 1980 to 2021             | 23.5      | 23.3      | 23        | 21.4      | 19        | 15.9      | 14.7      | 16.6      | 18.8      | 20.6      | 22.2      | 23.3      | 23.3      | 30        | 1980       | 2021     |
| Decile 9 minimum temperature (Degrees C) for years 1980 to 2021             | 27.2      | 27        | 26.6      | 25.4      | 23.4      | 21.6      | 20.7      | 21        | 23        | 24.8      | 26        | 27.1      | 26        | 30        | 1980       | 2021     |
| Mean number of days <= 2 Degrees C for years 1980 to 2021                   | 0         | 0         | 0         | 0         | 0         | 0         | 0         | 0         | 0         | 0         | 0         | 0         | 0         | 32        | 1980       | 2021     |
| Mean number of days <= 0 Degrees C for years 1980 to 2021                   | 0         | 0         | 0         | 0         | 0         | 0         | 0         | 0         | 0         | 0         | 0         | 0         | 0         | 32        | 1980       | 2021     |
| Mean daily ground minimum temperature (Degrees C) for years null to null    | N/A       |           |           |           |           |           |           |           |           |           |           |           |           |           |            |          |
| Lowest ground temperature (Degrees C) for years null to null                | N/A       |           |           |           |           |           |           |           |           |           |           |           |           |           |            |          |
| Date of Lowest ground temperature for years null to null                    | N/A       |           |           |           |           |           |           |           |           |           |           |           |           |           |            |          |
| Mean number of days ground min. temp. < -1 Degrees C for years null to null | N/A       |           |           |           |           |           |           |           |           |           |           |           |           |           |            |          |
| Mean rainfall (mm) for years 1980 to 2020                                   | 191.7     | 210       | 176       | 89.7      | 60.1      | 35.2      | 22.1      | 23.8      | 24.9      | 25.9      | 75.2      | 99.7      | 1076.1    | 29        | 1980       | 2020     |
| Highest rainfall (mm) for years 1980 to 2020                                | 880.8     | 542.8     | 684       | 312       | 195.6     | 194.4     | 166.8     | 139.4     | 151.4     | 223.6     | 607.4     | 568.8     | 2208.8    | 34        | 1980       | 2020     |
| Date of Highest rainfall for years 1980 to 2020                             | 1981      | 2009      | 2016      | 1990      | 1981      | 1990      | 1981      | 1997      | 2010      | 2010      | 2010      | 2018      | 2010      | N/A       | 1980       | 2020     |
| Lowest rainfall (mm) for years 1980 to 2020                                 | 0         | 32        | 35.6      | 8.6       | 1.4       | 2.8       | 0         | 0         | 0         | 0         | 0         | 0         | 504.9     | 34        | 1980       | 2020     |
| Date of Lowest rainfall for years 1980 to 2020                              | 2002      | 2011      | 2008      | 1994      | 2001      | 2004      | 1995      | 2018      | 1991      | 2001      | 2019      | 2019      | 2002      | N/A       | 1980       | 2020     |
| Decile 1 monthly rainfall (mm) for years 1980 to 2020                       | 21.5      | 44.2      | 42.3      | 22.5      | 12        | 8.2       | 4.2       | 0.7       | 0.5       | 1         | 3.6       | 16.2      | 593       | 34        | 1980       | 2020     |
| Decile 5 (median) monthly rainfall (mm) for years 1980 to 2020              | 108.6     | 276.6     | 133.2     | 80.8      | 56.8      | 25.6      | 15.5      | 15.2      | 16.2      | 11.2      | 27.2      | 76.2      | 1047      | 34        | 1980       | 2020     |
| Decile 9 monthly rainfall (mm) for years 1980 to 2020                       | 314.1     | 412.9     | 315.6     | 148.6     | 97.2      | 64.2      | 40.5      | 50.7      | 53.8      | 59        | 216.4     | 151.8     | 1605.2    | 34        | 1980       | 2020     |
| Highest daily rainfall (mm) for years 1980 to 2020                          | 173.6     | 213       | 175       | 134       | 94.4      | 167       | 134       | 81        | 65.4      | 106.2     | 132       | 390.4     | 390.4     | 32        | 1980       | 2020     |
| Date of Highest daily rainfall for years 1980 to 2020                       | 17-Jan-81 | 25-Feb-18 | 17-Mar-00 | 11-Apr-06 | 21-May-81 | 6-Jun-90  | 25-Jul-81 | 31-Aug-98 | 20-Sep-10 | 21-Oct-10 | 2-Nov-13  | 16-Dec-18 | 16-Dec-18 | N/A       | 1980       | 2020     |
| Mean number of days of rain for years 1980 to 2020                          | 15.1      | 14.4      | 15.1      | 14        | 12        | 7.4       | 6.7       | 6.4       | 5.2       | 5.6       | 7.9       | 10.5      | 100.3     | 34        | 1980       | 2020     |
| Mean number of days of rain >= 1 mm for years 1980 to 2020                  | 11.7      | 11.3      | 11.6      | 9.6       | 7.5       | 4.7       | 3.4       | 3.1       | 2.7       | 3.4       | 5         | 7         | 81        | 32        | 1980       | 2020     |
| Mean number of days of rain >= 10 mm for years 1980 to 2020                 | 5.3       | 5.2       | 4.4       | 2.5       | 1.7       | 0.8       | 0.4       | 0.6       | 0.8       | 0.6       | 2         | 2.3       | 26.6      | 32        | 1980       | 2020     |
| Mean number of days of rain >= 25 mm for years 1980 to 2020                 | 2.5       | 2.5       | 2.2       | 0.8       | 0.4       | 0.2       | 0.1       | 0.2       | 0.2       | 0.2       | 0.9       | 1         | 11.2      | 32        | 1980       | 2020     |
| Mean daily wind run (km) for years 2003 to 2021                             | 425       | 463       | 426       | 424       | 397       | 406       | 394       | 358       | 362       | 427       | 425       | 413       | 410       | 13        | 2003       | 2021     |
| Maximum wind gust speed (km/h) for years 1980 to 2021                       | 115       | 185       | 109       | 96        | 82        | 68        | 94        | 72        | 76        | 113       | 74        | 84        | 185       | 22        | 1980       | 2021     |
| Date of Maximum wind gust speed for years 1980 to 2021                      | 13-Jan-09 | 2-Feb-11  | 20-Mar-06 | 13-Apr-14 |           | 11-Jun-15 | 20-Jul-05 |           |           | 24-Oct-05 |           |           | 2-Feb-11  | N/A       | 1980       | 2021     |
| Mean daily sunshine (hours) for years null to null                          | N/A       |           |           |           |           |           |           |           |           |           |           |           |           |           |            |          |
| Mean daily solar exposure (MJ/(m^2)) for years 2007 to 2021                 | 19.4      | 18.9      | 17.5      | 15.8      | 14.1      | 13.3      | 14.4      | 17.6      | 20        | 22        | 22.8      | 22.8      | 18.2      | 14        | 2007       | 2021     |
| Mean number of clear days for years null to null                            | N/A       |           |           |           |           |           |           |           |           |           |           |           |           |           |            |          |
| Mean number of cloudy days for years null to null                           | N/A       |           |           |           |           |           |           |           |           |           |           |           |           |           |            |          |
| Mean daily evaporation (mm) for years 2007 to 2010                          | 27.5      | 27.6      | 26.8      | 25        | 22.9      | 20.7      | 19.6      | 20.5      | 22.9      | 25.1      | 26.6      | 27.6      | 34.4      | 20        | 1980       | 2010     |
| Mean 9am wet bulb temperature (Degrees C) for years 2000 to 2010            | 7         | 7         | 7         | 7         | 7         | 7         | 7         | 7         | 7         | 7         | 7         | 7         | 7         | 2000      | 2010       |          |
| Mean 9am dew point temperature (Degrees C) for years 2000 to 2010           | 7         | 7         | 7         | 7         | 7         | 7         | 7         | 7         | 7         | 7         | 7         | 7         | 7         | 2000      | 2010       |          |
| Mean 9am relative humidity (%) for years 2000 to 2010                       | 7         | 7         | 7         | 7         | 7         | 7         | 7         | 7         | 7         | 7         | 7         | 7         | 7         | 2000      | 2010       |          |
| Mean 9am cloud cover (oktas) for years null to null                         | N/A       |           |           |           |           |           |           |           |           |           |           |           |           |           |            |          |
| Mean 9am wind speed (km/h) for years 1980 to 2010                           | 16        | 17        | 19.4      | 21.4      | 21.3      | 21.3      | 20.3      | 18.6      | 16.7      | 16.2      | 15.3      | 14.8      | 18.2      | 18        | 1980       | 2010     |
| Mean 3pm temperature (Degrees C) for years 1980 to 2010                     | 28.7      | 28.9      | 28.5      | 26.8      | 24.9      | 22.8      | 22.4      | 22.7      | 24.4      | 25.8      | 27        | 28.2      | 25.9      | 20        | 1980       | 2010     |
| Mean 3pm wet bulb temperature (Degrees C) for years 2000 to 2010            | 7         | 7         | 7         | 7         | 7         | 7         | 7         | 7         | 7         | 7         | 7         | 7         | 7         | 2000      | 2010       |          |
| Mean 3pm dew point temperature (Degrees C) for years 2000 to 2010           | 7         | 7         | 7         | 7         | 7         | 7         | 7         | 7         | 7         | 7         | 7         | 7         | 7         | 2000      | 2010       |          |
| Mean 3pm relative humidity (%) for years 2000 to 2010                       | 7         | 7         | 7         | 7         | 7         | 7         | 7         | 7         | 7         | 7         | 7         | 7         | 7         | 2000      | 2010       |          |
| Mean 3pm cloud cover (oktas) for years null to null                         | N/A       |           |           |           |           |           |           |           |           |           |           |           |           |           |            |          |
| Mean 3pm wind speed (km/h) for years 1980 to 2010                           | 21.6      | 20.7      | 20.7      | 20.3      | 17.9      | 17.7      | 17.2      | 18.9      | 20.9      | 23.6      | 23        | 22.9      | 20.4      | 18        | 1980       | 2010     |

# Greenhouse gas emissions from tropical coastal wetlands and their alternative agricultural lands: Where significant mitigation gains lie

Correspondence to: Naima Iram (naima.iram@griffithuni.edu.au)

## Difference in physiochemical parameters across seasonal cycle

### Nonparametric Tests

| Hypothesis Test Summary |                                                                                          |                                         |                     |                             |
|-------------------------|------------------------------------------------------------------------------------------|-----------------------------------------|---------------------|-----------------------------|
|                         | Null Hypothesis                                                                          | Test                                    | Sig. <sup>a,b</sup> | Decision                    |
| 1                       | The distribution of Gravimetric water content% is the same across categories of Season . | Independent-Samples Kruskal-Wallis Test | .033                | Reject the null hypothesis. |
| 2                       | The distribution of BD (g cm <sup>-3</sup> ) is the same across categories of Season .   | Independent-Samples Kruskal-Wallis Test | .000                | Reject the null hypothesis. |
| 3                       | The distribution of Soil Tem is the same across categories of Season .                   | Independent-Samples Kruskal-Wallis Test | .000                | Reject the null hypothesis. |

a. The significance level is .050.

b. Asymptotic significance is displayed.

### Independent-Samples Kruskal-Wallis Test

#### Gravimetric water content% across Season

#### Independent-Samples Kruskal-Wallis Test Summary

|                   |                    |
|-------------------|--------------------|
| Total N           | 90                 |
| Test Statistic    | 6.800 <sup>a</sup> |
| Degree Of Freedom | 2                  |

Asymptotic Sig.(2-sided test)

.033

a. The test statistic is adjusted for ties.

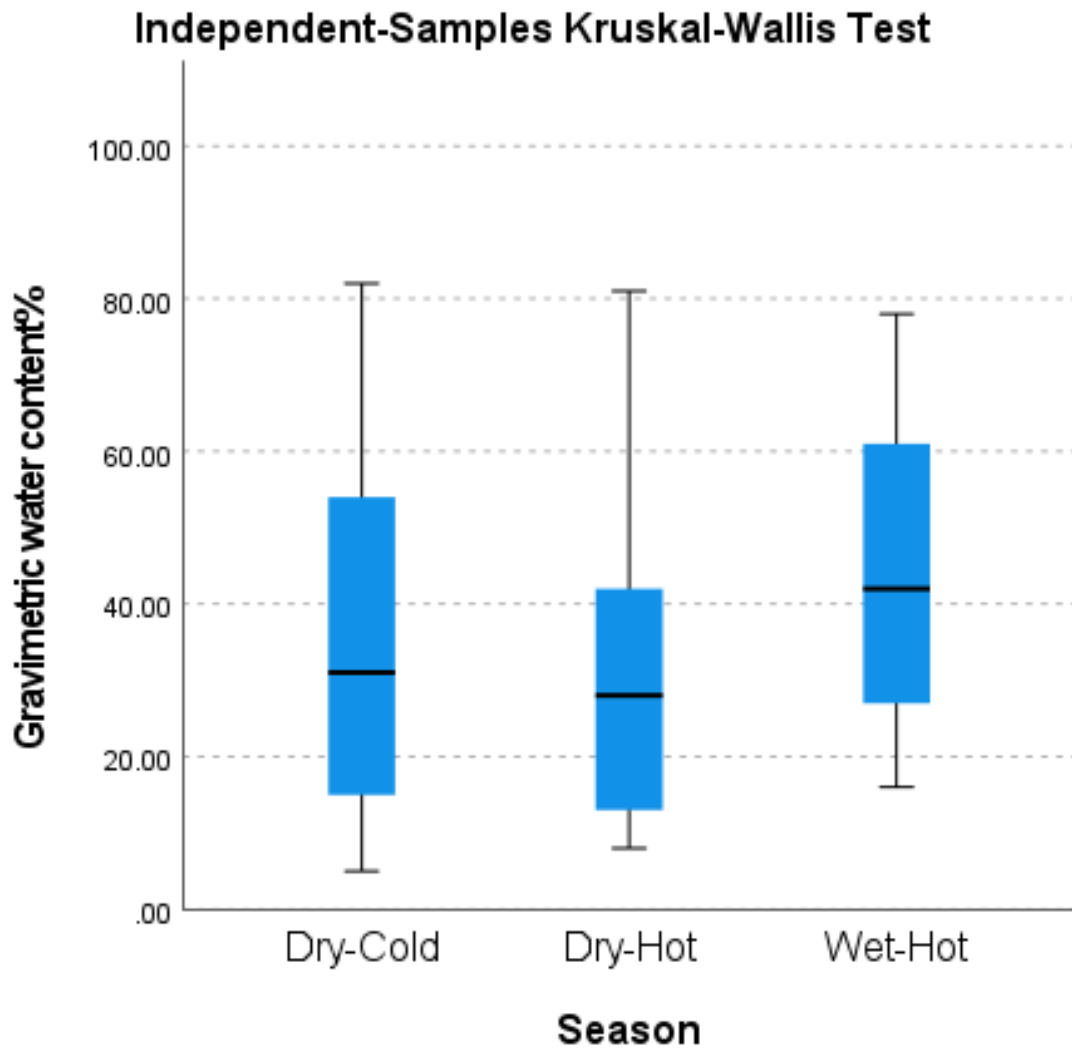

#### Pairwise Comparisons of Season

| Sample 1-Sample 2 | Test Statistic | Std. Error | Std. Test<br>Statistic | Sig. | Adj. Sig. <sup>a</sup> |
|-------------------|----------------|------------|------------------------|------|------------------------|
| Dry-Hot-Dry-Cold  | .317           | 6.743      | .047                   | .963 | 1.000                  |

|                  |         |       |        |      |      |
|------------------|---------|-------|--------|------|------|
| Dry-Hot-Wet-Hot  | -15.383 | 6.743 | -2.281 | .023 | .068 |
| Dry-Cold-Wet-Hot | -15.067 | 6.743 | -2.234 | .025 | .076 |

Each row tests the null hypothesis that the Sample 1 and Sample 2 distributions are the same.

Asymptotic significances (2-sided tests) are displayed. The significance level is .050.

a. Significance values have been adjusted by the Bonferroni correction for multiple tests.

## BD (g cm-3) across Season

### Independent-Samples Kruskal-Wallis Test

#### Summary

|                               |                     |
|-------------------------------|---------------------|
| Total N                       | 90                  |
| Test Statistic                | 54.599 <sup>a</sup> |
| Degree Of Freedom             | 2                   |
| Asymptotic Sig.(2-sided test) | .000                |

a. The test statistic is adjusted for ties.



## Independent-Samples Kruskal-Wallis Test

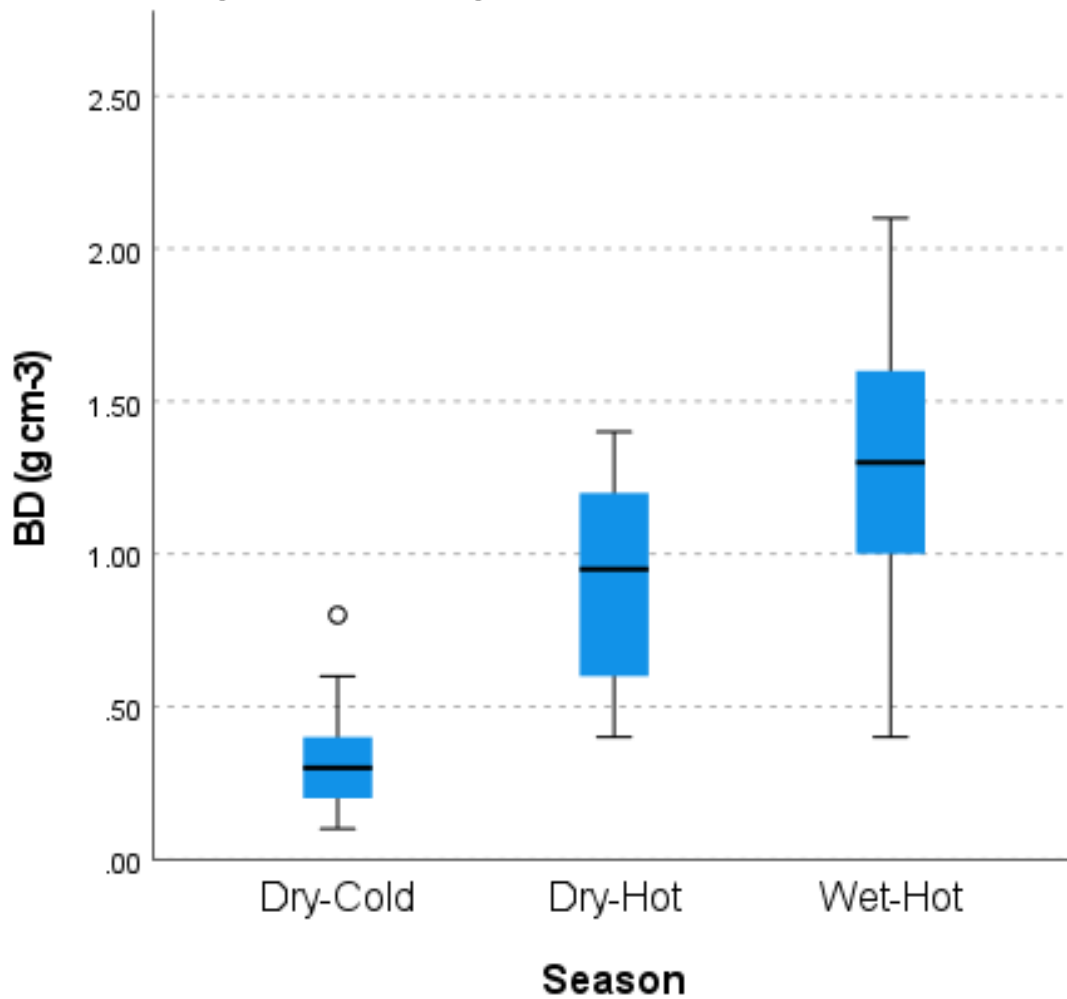

### Pairwise Comparisons of Season

| Sample 1-Sample 2 | Test Statistic | Std. Error | Std. Test<br>Statistic | Sig. | Adj. Sig. <sup>a</sup> |
|-------------------|----------------|------------|------------------------|------|------------------------|
| Dry-Cold-Dry-Hot  | -33.683        | 6.729      | -5.006                 | .000 | .000                   |
| Dry-Cold-Wet-Hot  | -48.517        | 6.729      | -7.210                 | .000 | .000                   |
| Dry-Hot-Wet-Hot   | -14.833        | 6.729      | -2.204                 | .028 | .083                   |

Each row tests the null hypothesis that the Sample 1 and Sample 2 distributions are the same.

Asymptotic significances (2-sided tests) are displayed. The significance level is .050.

a. Significance values have been adjusted by the Bonferroni correction for multiple tests.

## Soil Tem across Season

### Independent-Samples Kruskal-Wallis Test Summary

|                               |                     |
|-------------------------------|---------------------|
| Total N                       | 90                  |
| Test Statistic                | 57.561 <sup>a</sup> |
| Degree Of Freedom             | 2                   |
| Asymptotic Sig.(2-sided test) | .000                |

a. The test statistic is adjusted for ties.

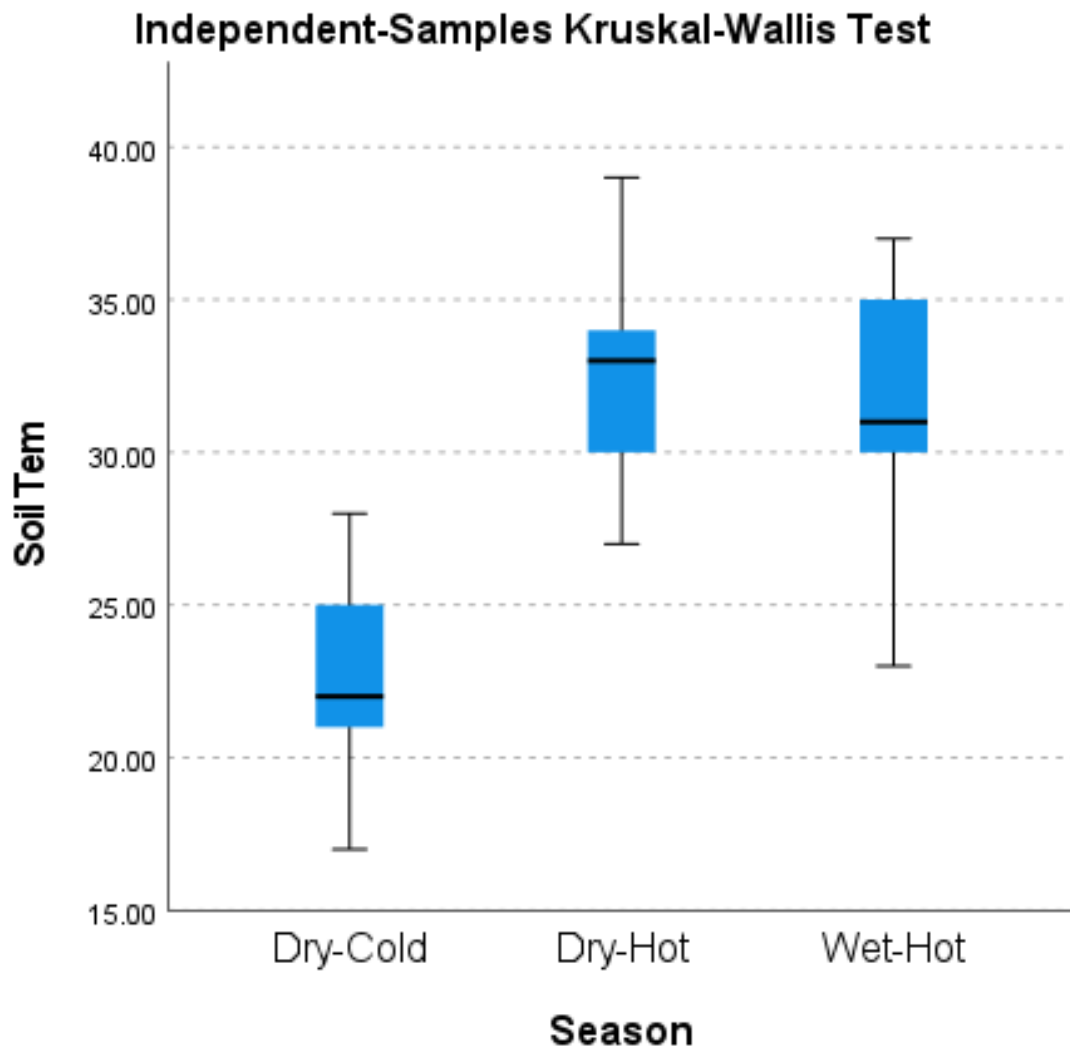

### Pairwise Comparisons of Season

| Sample 1-Sample 2 | Test Statistic | Std. Error | Std. Test<br>Statistic | Sig. | Adj. Sig. <sup>a</sup> |
|-------------------|----------------|------------|------------------------|------|------------------------|
| Dry-Cold-Wet-Hot  | -42.583        | 6.724      | -6.333                 | .000 | .000                   |
| Dry-Cold-Dry-Hot  | -45.617        | 6.724      | -6.784                 | .000 | .000                   |
| Wet-Hot-Dry-Hot   | 3.033          | 6.724      | .451                   | .652 | 1.000                  |

Each row tests the null hypothesis that the Sample 1 and Sample 2 distributions are the same.

Asymptotic significances (2-sided tests) are displayed. The significance level is .050.

a. Significance values have been adjusted by the Bonferroni correction for multiple tests.

### Physiochemical properties across three depths

| Parameter         | <i>t</i> | <i>n</i> | <i>p</i> |
|-------------------|----------|----------|----------|
| Gravimetric water | 0.268    | 90       | 0.875    |
| pH                | 0.109    | 90       | 0.947    |
| EC                | 5.134    | 90       | 0.077    |
| BD                | 25.994   | 90       | 0.000    |
| C                 | 20.407   | 90       | 0.000    |
| N                 | 21.467   | 90       | 0.000    |

Table 1. Greenhouse gas (GHG) fluxes from soils of tropical coastal wetlands: mangroves, saltmarsh, and freshwater (Fw) tidal forest during high and low tide during a dry-hot season

| GHG                                                    | Land-use type   | High tide | SE   | Low tide | SE   |
|--------------------------------------------------------|-----------------|-----------|------|----------|------|
|                                                        |                 | Mean      |      | Mean     |      |
| CO <sub>2</sub> (g m <sup>-2</sup> d <sup>-1</sup> )   | Mangroves       | 2.55      | 0.37 | 3.25     | 0.57 |
|                                                        | Saltmarsh       | -1.12     | 0.24 | 0.69     | 0.40 |
|                                                        | FW tidal forest | 2.97      | 1.35 | 5.35     | 2.68 |
| CH <sub>4</sub> (mg m <sup>-2</sup> d <sup>-1</sup> )  | Mangroves       | 3.38      | 0.98 | 236      | 73   |
|                                                        | Saltmarsh       | -0.13     | 0.06 | -25      | 6    |
|                                                        | Fw tidal forest | 1.10      | 0.52 | 457      | 108  |
| N <sub>2</sub> O (mg m <sup>-2</sup> d <sup>-1</sup> ) | Mangroves       | -0.74     | 0.17 | 0.15     | 0.06 |
|                                                        | Saltmarsh       | 0.19      | 0.06 | -0.14    | 0.04 |
|                                                        | FW tidal forest | 0.06      | 0.01 | -0.25    | 0.16 |
